# Supplementary material for: High-resolution lipidomics reveals dysregulation of lipid metabolism in respiratory syncytial virus pneumonia mice
Source: Royal Society of Chemistry journal article supplement (doi:10.1039/c8ra05640d), 2018-01-01
Supplement: c8ra05640d2.xlsx [file c8ra05640d2.xlsx]

## Sheet: Table S1
Supplementary Table 1: Lipids identified in lung tissue (ESI+)
Lipid name	Rt(min)	Mz	Adduct ion	Formula
Acylcarnitine 14:0	1.92	372.31	[M]+	C21H42NO4
Acylcarnitine 14:1	1.48	370.295	[M]+	C21H40NO4
Acylcarnitine 16:0	3.06	400.341	[M]+	C23H46NO4
Acylcarnitine 16:1	2.2	398.327	[M]+	C23H44NO4
Acylcarnitine 18:0	4.86	428.373	[M]+	C25H50NO4
Acylcarnitine 18:1	3.45	426.358	[M]+	C25H48NO4
Acylcarnitine 20:0	6.93	456.404	[M]+	C27H54NO4
Acylcarnitine 20:1	5.22	454.39	[M]+	C27H52NO4
Acylcarnitine 20:4	2.47	448.343	[M]+	C27H46NO4
Acylcarnitine 22:1	7.14	482.423	[M]+	C29H56NO4
Acylcarnitine 24:0	9.24	512.469	[M]+	C31H62NO4
Acylcarnitine 24:1	8.28	510.452	[M]+	C31H60NO4
Acylcarnitine 4:0	0.81	232.154	[M]+	C11H22NO4
BMP(18:0_22:6)	10.48	840.576	[M+NH4]+	C46H79O10P
BMP(18:1_22:6)	9.56	838.558	[M+NH4]+	C46H77O10P
BMP(22:5_22:6)	8.93	886.561	[M+NH4]+	C50H77O10P
Cer[NDS](d18:0_16:0)	12.85	540.533	[M+H]+	C34H69NO3
Cer[NDS](d18:0_24:0)	18.07	652.659	[M+H]+	C42H85NO3
Cer[NDS](d18:0_24:1)	16.8	650.647	[M+H]+	C42H83NO3
Cer[NDS](d20:0_24:0)	19.22	680.69	[M+H]+	C44H89NO3
Cer[NS](d18:1_16:0)	12.39	538.519	[M+H]+	C34H67NO3
Cer[NS](d18:1_16:1)	11.69	536.504	[M+H]+	C34H65NO3
Cer[NS](d18:1_18:0)	13.72	566.548	[M+H]+	C36H71NO3
Cer[NS](d18:1_20:0)	15.07	594.583	[M+H]+	C38H75NO3
Cer[NS](d18:1_22:0)	16.38	622.611	[M+H]+	C40H79NO3
Cer[NS](d18:1_22:1)	15.08	620.597	[M+H]+	C40H77NO3
Cer[NS](d18:1_24:0)	17.65	650.646	[M+H]+	C42H83NO3
Cer[NS](d18:2_16:0)	11.32	536.504	[M+H]+	C34H65NO3
Cer[NS](d18:2_18:0)	12.61	564.534	[M+H]+	C36H69NO3
Cer[NS](d18:2_20:0)	13.94	592.567	[M+H]+	C38H73NO3
Cer[NS](d18:2_22:0)	15.28	620.597	[M+H]+	C40H77NO3
Cer[NS](d18:2_24:0)	16.59	648.63	[M+H]+	C42H81NO3
Cer[NS](d18:2_24:1)	15.26	646.613	[M+H]+	C42H79NO3
Cer[NS](d18:2_24:2)	14.15	644.599	[M+H]+	C42H77NO3
Cer[NS](d20:1_24:0)	18.83	678.673	[M+H]+	C44H87NO3
Cer[NS](d20:1_24:1)	17.58	676.657	[M+H]+	C44H85NO3
Cer[NS](d20:1_26:0)	19.93	706.709	[M+H]+	C46H91NO3
DG(16:0_16:0)	14.81	586.54	[M+NH4]+	C35H68O5
DG(16:0_18:1)	14.95	612.553	[M+NH4]+	C37H70O5
DG(16:0_18:2)	13.92	610.538	[M+NH4]+	C37H68O5
DG(16:0_22:5)	13.74	660.557	[M+NH4]+	C41H70O5
DG(16:0_22:6)	13.28	658.543	[M+NH4]+	C41H68O5
DG(18:0_18:2)	15.23	638.573	[M+NH4]+	C39H72O5
DG(18:0_20:4)	14.98	662.574	[M+NH4]+	C41H72O5
DG(18:1_18:1)	15.08	638.573	[M+NH4]+	C39H72O5
DG(18:1_18:2)	14.05	636.558	[M+NH4]+	C39H70O5
DG(18:1_22:6)	13.4	684.553	[M+NH4]+	C43H70O5
GlcCer[NDS](d18:0_16:0)	11.6	702.586	[M+H]+	C40H79NO8
GlcCer[NS](d18:1_16:0)	11.19	700.572	[M+H]+	C40H77NO8
GlcCer[NS](d18:1_22:0)	15.05	784.664	[M+H]+	C46H89NO8
GlcCer[NS](d18:1_24:0)	16.33	812.701	[M+H]+	C48H93NO8
GlcCer[NS](d18:1_24:1)	15.03	810.682	[M+H]+	C48H91NO8
GlcCer[NS](d20:1_24:0)	17.55	840.727	[M+H]+	C50H97NO8
LysoPC 16:0	2.75	496.341	[M+H]+	C24H50NO7P
LysoPC 18:0	4.45	524.37	[M+H]+	C26H54NO7P
LysoPC 18:1	3.1	522.353	[M+H]+	C26H52NO7P
LysoPC 18:2	2.07	520.338	[M+H]+	C26H50NO7P
LysoPC 20:0	6.68	552.403	[M+H]+	C28H58NO7P
LysoPC 24:0	9.29	608.465	[M+H]+	C32H66NO7P
LysoPE 18:1	2.9	480.307	[M+H]+	C23H46NO7P
PC(12:0_18:1)	9.89	704.523	[M+H]+	C38H74NO8P
PC(12:0_20:3)	9.93	728.523	[M+H]+	C40H74NO8P
PC(14:0_14:0)	9.71	678.505	[M+H]+	C36H72NO8P
PC(14:0_16:0)	10.8	706.539	[M+H]+	C38H76NO8P
PC(16:0_16:0)	12	734.567	[M+H]+	C40H80NO8P
PC(16:0_16:1)	11	732.556	[M+H]+	C40H78NO8P
PC(16:0_20:4)	11.1	782.572	[M+H]+	C44H80NO8P
PC(16:0_22:5)	11.52	808.585	[M+H]+	C46H82NO8P
PC(16:0_22:6)	10.81	806.571	[M+H]+	C46H80NO8P
PC(16:1_16:1)	10.13	730.539	[M+H]+	C40H76NO8P
PC(18:0_18:1)	13.42	788.619	[M+H]+	C44H86NO8P
PC(18:1_18:1)	12.33	786.596	[M+H]+	C44H84NO8P
PC(18:2_18:2)	10.55	782.572	[M+H]+	C44H80NO8P
PC(18:2_20:4)	10.4	806.571	[M+H]+	C46H80NO8P
PC(20:3_20:3)	11.98	834.6	[M+H]+	C48H84NO8P
PC(P-14:0_16:0)	10.83	690.539	[M+H]+	C38H76NO7P
PC(P-14:0_18:0)	12.57	718.574	[M+H]+	C40H80NO7P
PC(P-14:0_18:1)	11.5	716.562	[M+H]+	C40H78NO7P
PC(P-14:0_2:0)	1.97	494.322	[M+H]+	C24H48NO7P
PC(P-14:0_20:0)	12.87	746.605	[M+H]+	C42H84NO7P
PC(P-14:0_20:1)	11.95	744.586	[M+H]+	C42H82NO7P
PC(P-14:0_22:0)	14.19	774.639	[M+H]+	C44H88NO7P
PC(P-14:0_22:1)	13.04	772.619	[M+H]+	C44H86NO7P
PC(P-14:0_22:2)	12.15	770.609	[M+H]+	C44H84NO7P
PC(P-14:0_22:3)	11.78	768.592	[M+H]+	C44H82NO7P
PC(P-14:0_22:4)	11.58	766.58	[M+H]+	C44H80NO7P
PC(P-14:0_24:0)	15.46	802.664	[M+H]+	C46H92NO7P
PC(P-14:0_24:1)	14.55	800.655	[M+H]+	C46H90NO7P
PC(P-14:0_24:2)	13.22	798.639	[M+H]+	C46H88NO7P
PC(P-14:0_24:4)	11.89	794.606	[M+H]+	C46H84NO7P
PC(P-14:0_26:0)	16.53	830.701	[M+H]+	C48H96NO7P
PC(P-14:0_26:1)	15.47	828.686	[M+H]+	C48H94NO7P
PC(P-14:0_26:2)	14.5	826.667	[M+H]+	C48H92NO7P
PC(P-14:0_26:4)	12.79	822.634	[M+H]+	C48H88NO7P
PC(P-16:0_2:0)	2.81	522.353	[M+H]+	C26H52NO7P
PC(P-16:0_22:3)	12.66	796.62	[M+H]+	C46H86NO7P
PC(P-16:0_22:6)	11.26	790.58	[M+H]+	C46H80NO7P
PC(P-16:0_26:2)	15.72	854.702	[M+H]+	C50H96NO7P
PC(P-16:0_26:4)	14.33	850.674	[M+H]+	C50H92NO7P
PC(P-18:0_22:3)	13.68	824.652	[M+H]+	C48H90NO7P
PC(P-18:0_/22:6)	11.58	818.6	[M+H]+	C48H84NO7P
PC(P-18:0_26:4)	15.53	878.704	[M+H]+	C52H96NO7P
PC(P-20:0_18:5)	11.46	792.592	[M+H]+	C46H82NO7P
PC(P-22:0_18:5)	11.97	820.623	[M+H]+	C48H86NO7P
PC(P-22:0_2:0)	8.25	606.449	[M+H]+	C32H64NO7P
PE(16:0_16:0)	12.34	692.522	[M+H]+	C37H74NO8P
PE(16:0_18:2)	11.58	716.519	[M+H]+	C39H74NO8P
PE(16:0_20:4)	11.41	740.519	[M+H]+	C41H74NO8P
PE(16:1_22:6)	10.66	762.508	[M+H]+	C43H72NO8P
PE(18:0_18:1)	13.79	746.565	[M+H]+	C41H80NO8P
PE(18:0_18:2)	12.82	744.555	[M+H]+	C41H78NO8P
PE(18:0_20:3)	13.15	770.567	[M+H]+	C43H80NO8P
PE(18:0_20:4)	12.64	768.552	[M+H]+	C43H78NO8P
PE(18:0_22:4)	13.54	796.586	[M+H]+	C45H82NO8P
PE(18:0_22:5)	12.69	794.574	[M+H]+	C45H80NO8P
PE(18:2_18:2)	10.82	740.521	[M+H]+	C41H74NO8P
PE(20:4_20:4)	10.41	788.528	[M+H]+	C45H74NO8P
PE(P-16:0_16:0)	12.99	676.526	[M+H]+	C37H74NO7P
PE(P-16:0_16:1)	11.89	674.509	[M+H]+	C37H72NO7P
PE(P-16:0_18:1)	13.13	702.542	[M+H]+	C39H76NO7P
PE(P-16:0_18:2)	12.16	700.525	[M+H]+	C39H74NO7P
PE(P-16:0_20:3)	12.32	726.539	[M+H]+	C41H76NO7P
PE(P-16:0_20:4)	11.96	724.528	[M+H]+	C41H74NO7P
PE(P-16:0_22:4)	12.88	752.56	[M+H]+	C43H78NO7P
PE(P-16:0_22:6)	11.62	748.524	[M+H]+	C43H74NO7P
PE(P-16:0_24:4)	13.89	780.593	[M+H]+	C45H82NO7P
PE(P-18:0_18:1)	14.43	730.576	[M+H]+	C41H80NO7P
PE(P-18:0_20:4)	13.22	752.56	[M+H]+	C43H78NO7P
PE(P-18:0_22:4)	14.14	780.593	[M+H]+	C45H82NO7P
PE(P-18:0_22:5)	13.27	778.571	[M+H]+	C45H80NO7P
PE(P-20:0_20:4)	14.5	780.593	[M+H]+	C45H82NO7P
PG(16:0_16:0)	11.06	740.546	[M+NH4]+	C38H75O10P
PG(16:0_18:1)	11.21	766.555	[M+NH4]+	C40H77O10P
PG(16:0_18:2)	10.41	764.546	[M+NH4]+	C40H75O10P
PG(16:0_20:4)	10.27	788.544	[M+NH4]+	C42H75O10P
PG(16:0_22:5)	10.34	814.559	[M+NH4]+	C44H77O10P
PG(16:0_22:6)	10.04	812.545	[M+NH4]+	C44H75O10P
SM(d14:0_20:0)	11.06	705.589	[M+H]+	C39H81N2O6P
SM(d14:0_22:0)	12.32	733.62	[M+H]+	C41H85N2O6P
SM(d14:0_24:0)	13.63	761.655	[M+H]+	C43H89N2O6P
SM(d14:0_26:0)	14.95	789.68	[M+H]+	C45H93N2O6P
SM(d14:0_28:0)	16.26	817.711	[M+H]+	C47H97N2O6P
SM(d14:1_16:0)	8.41	647.511	[M+H]+	C35H71N2O6P
SM(d14:1_18:0)	9.47	675.541	[M+H]+	C37H75N2O6P
SM(d14:1_20:0)	10.62	703.576	[M+H]+	C39H79N2O6P
SM(d14:1_22:0)	11.86	731.608	[M+H]+	C41H83N2O6P
SM(d14:1_24:0)	13.16	759.638	[M+H]+	C43H87N2O6P
SM(d14:1_26:0)	14.48	787.664	[M+H]+	C45H91N2O6P
SM(d14:1_26:1)	13.21	785.654	[M+H]+	C45H89N2O6P
SM(d14:1_28:1)	13.84	813.682	[M+H]+	C47H93N2O6P
SM(d14:1_28:2)	13.38	811.669	[M+H]+	C47H91N2O6P
TG(12:0_12:0_12:0)	16.92	661.54	[M+Na]+	C39H74O6
TG(12:0_14:0_16:0)	19.99	740.679	[M+NH4]+	C45H86O6
TG(12:0_16:0_18:2)	20.21	792.708	[M+NH4]+	C49H90O6
TG(14:0_16:0_16:1)	21.05	794.723	[M+NH4]+	C49H92O6
TG(14:0_16:0_18:1)	21.99	822.756	[M+NH4]+	C51H96O6
TG(14:0_16:0_18:2)	21.19	820.734	[M+NH4]+	C51H94O6
TG(14:0_16:1_18:2)	20.28	818.719	[M+NH4]+	C51H92O6
TG(14:0_18:1_18:2)	21.26	851.71	[M+Na]+	C53H96O6
TG(14:0__18:2_18:2)	20.44	844.739	[M+NH4]+	C53H94O6
TG(16:0_16:0_16:0)	22.8	829.727	[M+Na]+	C51H98O6
TG(16:0_16:0_16:1)	21.98	827.713	[M+Na]+	C51H96O6
TG(16:0_16:0_18:0)	23.62	852.797	[M+NH4]+	C53H102O6
TG(16:0_16:0_18:1)	22.84	855.744	[M+Na]+	C53H100O6
TG(16:0_16:0_18:2)	22.1	853.729	[M+Na]+	C53H98O6
TG(16:0_16:0_20:4)	21.84	877.727	[M+Na]+	C55H98O6
TG(16:0_16:0_22:5)	21.9	903.742	[M+Na]+	C57H100O6
TG(16:0_16:1_18:1)	22.11	848.771	[M+NH4]+	C53H98O6
TG(16:0_16:1_18:2)	21.26	846.757	[M+NH4]+	C53H96O6
TG(16:0_18:0_18:0)	24.37	880.831	[M+NH4]+	C55H106O6
TG(16:0_18:0_18:1)	23.65	878.814	[M+NH4]+	C55H104O6
TG(16:0_18:1_18:1)	22.88	876.803	[M+NH4]+	C55H102O6
TG(16:0_18:1_18:2)	22.16	874.788	[M+NH4]+	C55H100O6
TG(16:0_18:1_22:6)	21.57	922.784	[M+NH4]+	C59H100O6
TG(16:0_18:2_18:2)	21.4	872.766	[M+NH4]+	C55H98O6
TG(16:0_18:2_18:3)	20.72	870.752	[M+NH4]+	C55H96O6
TG(16:0_18:2_22:6)	20.78	920.767	[M+NH4]+	C59H98O6
TG(16:1_16:1_18:2)	20.42	849.698	[M+Na]+	C53H94O6
TG(16:1_18:1_18:2)	21.4	877.728	[M+Na]+	C55H98O6
TG(18:0_18:0_18:0)	24.97	913.825	[M+Na]+	C57H110O6
TG(18:0_18:0_18:1)	24.39	911.809	[M+Na]+	C57H108O6
TG(18:0_18:0_20:6)	22.41	929.76	[M+Na]+	C59H102O6
TG(18:0_18:1_18:1)	23.68	909.789	[M+Na]+	C57H106O6
TG(18:0_18:1_18:2)	22.94	902.816	[M+NH4]+	C57H104O6
TG(18:0_18:4_20:2)	22.06	929.761	[M+Na]+	C59H102O6
TG(18:1_18:1_18:2)	22.21	900.8	[M+NH4]+	C57H102O6
TG(18:1_18:1_20:4)	21.91	929.76	[M+Na]+	C59H102O6
TG(18:1_18:1_22:0)	24.95	965.854	[M+Na]+	C61H114O6
TG(18:1_18:2_18:2)	21.46	903.743	[M+Na]+	C57H100O6
TG(18:1_18:2_20:1)	22.97	928.835	[M+NH4]+	C59H106O6
TG(18:1_18:2_20:2)	22.29	926.812	[M+NH4]+	C59H104O6
TG(18:2_18:2_18:2)	20.69	901.724	[M+Na]+	C57H98O6

## Sheet: Table S2
Supplementary Table 2: Lipids identified in lung tissue (ESI-)
Lipid name	Rt(min)	Mz	Adduct ion	Formula
Cer[NDS](d18:0_16:0)	12.71	538.519	[M-H]-	C34H69NO3
Cer[NS](d18:1_16:0)	12.27	536.504	[M-H]-	C34H67NO3
Cer[NS](d18:2_16:0)	11.23	534.489	[M-H]-	C34H65NO3
Cer[NS](d18:1_24:0)	17.49	648.63	[M-H]-	C42H83NO3
Cer[NS](d18:1_24:1)	16.2	646.613	[M-H]-	C42H81NO3
Cer[NS](d18:2_24:1)	15.11	644.598	[M-H]-	C42H79NO3
FA 16:0	4.97	255.233	[M-H]-	C16H32O2
FA 16:1	3.47	253.218	[M-H]-	C16H30O2
FA 16:2	2.51	251.201	[M-H]-	C16H28O2
FA 16:4	2.11	247.17	[M-H]-	C16H24O2
FA 18:0	7.27	283.264	[M-H]-	C18H36O2
FA 18:1	5.5	281.249	[M-H]-	C18H34O2
FA 18:2	4.02	279.233	[M-H]-	C18H32O2
FA 18:3	3.06	277.217	[M-H]-	C18H30O2
FA 20:0	8.68	311.296	[M-H]-	C20H40O2
FA 20:1	7.55	309.28	[M-H]-	C20H38O2
FA 20:2	6.08	307.265	[M-H]-	C20H36O2
FA 20:3	4.73	305.249	[M-H]-	C20H34O2
FA 20:4	3.73	303.234	[M-H]-	C20H32O2
FA 20:5	2.77	301.218	[M-H]-	C20H30O2
FA 20:6	2.75	299.201	[M-H]-	C20H28O2
FA 21:0	9.32	325.312	[M-H]-	C21H42O2
FA 22:0	9.97	339.327	[M-H]-	C22H44O2
FA 22:1	8.8	337.312	[M-H]-	C22H42O2
FA 22:2	7.88	335.297	[M-H]-	C22H40O2
FA 22:3	6.99	333.28	[M-H]-	C22H38O2
FA 22:4	5.5	331.263	[M-H]-	C22H36O2
FA 22:5	4.23	329.248	[M-H]-	C22H34O2
FA 22:6	3.27	327.232	[M-H]-	C22H32O2
LysoPE 16:0	2.75	452.277	[M-H]-	C21H44NO7P
LysoPE 18:1	3.09	478.294	[M-H]-	C23H46NO7P
LysoPE 20:4	2.07	500.28	[M-H]-	C25H44NO7P
LysoPE 22:4	2.92	528.308	[M-H]-	C27H48NO7P
LysoPE 22:6	1.99	524.277	[M-H]-	C27H44NO7P
LysoPG 16:0	1.46	483.273	[M-H]-	C22H45O9P
LysoPI 16:0	1.45	571.288	[M-H]-	C25H49O12P
LysoPI 18:0	2.5	599.319	[M-H]-	C27H53O12P
PE(16:0_18:1)	12.37	716.526	[M-H]-	C39H76NO8P
PE(16:0_18:2)	11.44	714.511	[M-H]-	C39H74NO8P
PE(18:0_18:1)	13.64	744.555	[M-H]-	C41H80NO8P
PE(18:0_18:2)	12.67	742.536	[M-H]-	C41H78NO8P
PE(18:1_18:1)	12.52	742.536	[M-H]-	C41H78NO8P
PE(18:1_18:2)	11.66	740.525	[M-H]-	C41H76NO8P
PE(16:0_20:4)	11.28	738.511	[M-H]-	C41H74NO8P
PE(18:0_20:4)	12.48	766.543	[M-H]-	C43H78NO8P
PE(18:1_20:4)	11.4	764.524	[M-H]-	C43H76NO8P
PE(16:0_22:6)	10.92	762.506	[M-H]-	C43H74NO8P
PE(18:0_22:4)	13.38	794.574	[M-H]-	C45H82NO8P
PE(18:0_22:5)	12.54	792.558	[M-H]-	C45H80NO8P
PE(18:0_22:6)	12.16	790.543	[M-H]-	C45H78NO8P
PE(18:1_22:6)	11.12	788.523	[M-H]-	C45H76NO8P
PG(14:0_16:0)	9.19	693.468	[M-H]-	C36H71O10P
PG(16:0_16:0)	10.08	721.5	[M-H]-	C38H75O10P
PG(16:0_16:1)	9.34	719.489	[M-H]-	C38H73O10P
PG(16:0_18:1)	10.21	747.521	[M-H]-	C40H77O10P
PG(16:0_18:2)	9.54	745.5	[M-H]-	C40H75O10P
PG(18:1_18:1)	10.35	773.535	[M-H]-	C42H79O10P
PG(18:1_18:2)	9.66	771.52	[M-H]-	C42H77O10P
PG(16:0_20:4)	9.44	769.501	[M-H]-	C42H75O10P
PG(18:2_18:2)	8.56	769.502	[M-H]-	C42H75O10P
PG(18:0_20:4)	10.34	797.535	[M-H]-	C44H79O10P
PG(16:0_22:5)	9.51	795.52	[M-H]-	C44H77O10P
PG(18:1_20:4)	9.02	795.52	[M-H]-	C44H77O10P
PG(18:2_20:4)	8.48	793.503	[M-H]-	C44H75O10P
PG(18:2_22:6)	8.35	817.502	[M-H]-	C46H75O10P
PI(16:0_18:2)	9.27	833.517	[M-H]-	C43H79O13P
PI(18:0_18:2)	10.18	861.547	[M-H]-	C45H83O13P
PI(18:1_18:2)	9.39	859.536	[M-H]-	C45H81O13P
PI(16:0_20:4)	9.18	857.52	[M-H]-	C45H79O13P
PI(18:0_20:4)	10.07	885.554	[M-H]-	C47H83O13P
PI(18:0_20:5)	9.56	883.533	[M-H]-	C47H81O13P
PI(18:1_20:4)	9.29	883.533	[M-H]-	C47H81O13P
PI(20:3_20:3)	9.86	909.551	[M-H]-	C49H83O13P
PE(P-16:0_16:0)	12.85	674.511	[M-H]-	C37H74NO7P
PE(P-16:0_16:1)	11.76	672.497	[M-H]-	C37H72NO7P
PE(P-16:0_18:1)	12.99	700.528	[M-H]-	C39H76NO7P
PE(P-16:0_18:2)	12.02	698.51	[M-H]-	C39H74NO7P
PE(P-18:0_18:1)	14.28	728.564	[M-H]-	C41H80NO7P
PE(P-16:0_20:2)	13.13	726.544	[M-H]-	C41H78NO7P
PE(P-18:0_18:2)	13.28	726.544	[M-H]-	C41H78NO7P
PE(P-16:0_20:3)	12.2	724.533	[M-H]-	C41H76NO7P
PE(P-16:0_20:4)	11.81	722.512	[M-H]-	C41H74NO7P
PE(P-16:0_20:5)	11.02	720.499	[M-H]-	C41H72NO7P
PE(P-18:0_20:3)	13.63	752.558	[M-H]-	C43H80NO7P
PE(P-16:0_22:4)	12.71	750.545	[M-H]-	C43H78NO7P
PE(P-18:0_20:4)	13.06	750.545	[M-H]-	C43H78NO7P
PE(P-16:0_22:5)	11.89	748.53	[M-H]-	C43H76NO7P
PE(P-16:0_22:6)	11.48	746.515	[M-H]-	C43H74NO7P
PE(P-16:0_24:4)	13.74	778.579	[M-H]-	C45H82NO7P
PE(P-18:0_22:4)	13.98	778.579	[M-H]-	C45H82NO7P
PE(P-20:0_20:4)	14.35	778.579	[M-H]-	C45H82NO7P
PE(P-18:0_22:5)	13.12	776.564	[M-H]-	C45H80NO7P
PE(P-18:0_22:6)	12.71	774.547	[M-H]-	C45H78NO7P
PE(P-20:0_22:6)	13.98	802.579	[M-H]-	C47H82NO7P
PS(16:0_18:1)	10.48	760.511	[M-H]-	C40H76NO10P
PS(18:0_18:1)	11.63	788.544	[M-H]-	C42H80NO10P
PS(18:0_18:2)	10.97	786.533	[M-H]-	C42H78NO10P
PS(18:0_20:3)	11.38	812.547	[M-H]-	C44H80NO10P
PS(18:0_20:4)	10.53	810.53	[M-H]-	C44H78NO10P
PS(18:0_22:4)	11.42	838.561	[M-H]-	C46H82NO10P
PS(18:0_22:5)	10.64	836.539	[M-H]-	C46H80NO10P
PS(18:0_22:6)	10.42	834.534	[M-H]-	C46H78NO10P
SM(d14:2_28:0)	14.47	857.675	[M+FA-H]-	C47H93N2O6P

## Sheet: Table S3
Supplementary Table 3: Lipids identified in plasma (ESI+)
Lipid name	Rt(min)	Mz	Adduct ion name	Formula
16:1 Cholesteryl ester	21.74	640.604	[M+NH4]+	C43H74O2
18:1 Cholesteryl ester	22.79	668.632	[M+NH4]+	C45H78O2
18:2 Cholesteryl ester	21.87	666.619	[M+NH4]+	C45H76O2
20:3 Cholesteryl ester	22.01	692.634	[M+NH4]+	C47H78O2
20:4 Cholesteryl ester	21.35	690.615	[M+NH4]+	C47H76O2
22:6 Cholesteryl ester	20.87	714.614	[M+NH4]+	C49H76O2
Acylcarnitine 10:0	1.08	316.248	[M]+	C17H34NO4
Acylcarnitine 10:1	1	314.232	[M]+	C17H32NO4
Acylcarnitine 12:0	1.39	344.279	[M]+	C19H38NO4
Acylcarnitine 14:2	1.33	368.279	[M]+	C21H38NO4
Acylcarnitine 16:0	3.25	400.343	[M]+	C23H46NO4
Acylcarnitine 16:1	2.29	398.326	[M]+	C23H44NO4
Acylcarnitine 16:3	1.48	394.292	[M]+	C23H40NO4
Acylcarnitine 18:2	2.63	424.34	[M]+	C25H46NO4
Acylcarnitine 20:4	2.55	448.342	[M]+	C27H46NO4
Acylcarnitine 20:5	1.98	446.327	[M]+	C27H44NO4
Acylcarnitine 4:0	0.82	232.154	[M]+	C11H22NO4
Acylcarnitine 6:0	0.88	260.186	[M]+	C13H26NO4
Cer[NS](d18:1_22:0)	16.22	622.609	[M+H]+	C40H79NO3
Cer[NS](d18:1_24:0)	17.48	650.645	[M+H]+	C42H83NO3
Cer[NS](d18:1_24:1)	16.19	648.627	[M+H]+	C42H81NO3
DG(18:1_18:2)	13.91	636.557	[M+NH4]+	C39H70O5
DG(18:2_18:2)	12.9	634.543	[M+NH4]+	C39H68O5
GlcCer[NS](d18:1_24:1)	14.82	810.68	[M+H]+	C48H91NO8
LysoPC 14:0	1.76	468.307	[M+H]+	C22H46NO7P
LysoPC 16:0	2.76	496.339	[M+H]+	C24H50NO7P
LysoPC 18:0	4.06	524.374	[M+H]+	C26H54NO7P
LysoPC 18:1	3.62	522.357	[M+H]+	C26H52NO7P
LysoPC 20:0	6.78	552.403	[M+H]+	C28H58NO7P
LysoPC 20:1	4.87	550.384	[M+H]+	C28H56NO7P
LysoPC 20:5	1.74	542.324	[M+H]+	C28H48NO7P
LysoPC 22:0	8.24	580.434	[M+H]+	C30H62NO7P
LysoPC 22:6	2.1	568.339	[M+H]+	C30H50NO7P
LysoPC 24:0	9.37	608.467	[M+H]+	C32H66NO7P
LysoPC 24:1	8.32	606.45	[M+H]+	C32H64NO7P
PC(16:0_16:0)	12.03	734.571	[M+H]+	C40H80NO8P
PC(16:0_16:1)	11.02	732.554	[M+H]+	C40H78NO8P
PC(16:0_20:4)	11.07	782.57	[M+H]+	C44H80NO8P
PC(16:0_22:6)	10.79	806.569	[M+H]+	C46H80NO8P
PC(16:1_16:1)	10.16	730.537	[M+H]+	C40H76NO8P
PC(18:0_18:0)	14.66	790.633	[M+H]+	C44H88NO8P
PC(18:0_18:1)	13.47	788.616	[M+H]+	C44H86NO8P
PC(18:0_20:4)	12.27	810.604	[M+H]+	C46H84NO8P
PC(18:1_18:1)	12.46	786.603	[M+H]+	C44H84NO8P
PC(18:1_18:2)	11.58	784.588	[M+H]+	C44H82NO8P
PC(18:1_20:5)	10.47	806.569	[M+H]+	C46H80NO8P
PC(18:2_18:2)	10.56	782.57	[M+H]+	C44H80NO8P
PC(18:2_20:4)	10.4	806.569	[M+H]+	C46H80NO8P
PC(20:1_22:6)	12.02	860.619	[M+H]+	C50H86NO8P
PC(P-14:0_18:0)	12.63	718.572	[M+H]+	C40H80NO7P
PC(P-14:0_2:0)	1.98	494.322	[M+H]+	C24H48NO7P
PC(P-14:0_20:2)	11.83	742.577	[M+H]+	C42H80NO7P
PC(P-14:0_22:0)	14.4	774.638	[M+H]+	C44H88NO7P
PC(P-14:0_22:1)	13.14	772.621	[M+H]+	C44H86NO7P
PC(P-14:0_22:2)	12.12	770.606	[M+H]+	C44H84NO7P
PC(P-14:0_22:3)	11.83	768.591	[M+H]+	C44H82NO7P
PC(P-14:0_22:4)	11.59	766.575	[M+H]+	C44H80NO7P
PC(P-14:0_24:0)	15.78	802.672	[M+H]+	C46H92NO7P
PC(P-14:0_24:1)	14.69	800.65	[M+H]+	C46H90NO7P
PC(P-14:0_24:2)	13.71	798.636	[M+H]+	C46H88NO7P
PC(P-14:0_24:4)	11.92	794.609	[M+H]+	C46H84NO7P
PC(P-14:0_26:0)	17.05	830.701	[M+H]+	C48H96NO7P
PC(P-14:0_26:1)	15.72	828.683	[M+H]+	C48H94NO7P
PC(P-14:0_26:4)	13.53	822.637	[M+H]+	C48H88NO7P
PC(P-16:0_2:0)	3.12	522.356	[M+H]+	C26H52NO7P
PC(P-16:0_22:3)	12.75	796.625	[M+H]+	C46H86NO7P
PC(P-16:0_22:6)	11.25	790.575	[M+H]+	C46H80NO7P
PC(P-18:0_18:5)	10.81	764.564	[M+H]+	C44H78NO7P
PC(P-18:0_2:0)	4.42	550.387	[M+H]+	C28H56NO7P
PC(P-18:0_22:3)	13.81	824.651	[M+H]+	C48H90NO7P
PC(P-18:0_22:6)	11.6	818.609	[M+H]+	C48H84NO7P
PC(P-18:0_26:4)	15.72	878.702	[M+H]+	C52H96NO7P
PC(P-20:0_2:0)	6.98	578.419	[M+H]+	C30H60NO7P
PC(P-20:0_22:3)	15.78	852.688	[M+H]+	C50H94NO7P
PC(P-20:0_22:6)	13.8	846.64	[M+H]+	C50H88NO7P
PC(P-22:0_18:5)	11.98	820.629	[M+H]+	C48H86NO7P
PE(16:0_18:2)	11.48	716.52	[M+H]+	C39H74NO8P
PE(16:1_22:5)	11.02	764.524	[M+H]+	C43H74NO8P
PE(18:0_18:2)	12.71	744.553	[M+H]+	C41H78NO8P
PE(P-16:0_20:4)	11.86	724.527	[M+H]+	C41H74NO7P
PE(P-16:0_22:6)	11.53	748.522	[M+H]+	C43H74NO7P
PE(P-18:0_20:4)	13.11	752.559	[M+H]+	C43H78NO7P
PE(P-20:0_20:4)	14.42	780.592	[M+H]+	C45H82NO7P
SM(d14:0_20:0)	11.05	705.587	[M+H]+	C39H81N2O6P
SM(d14:1_18:0)	9.48	675.546	[M+H]+	C37H75N2O6P
SM(d14:1_20:0)	10.71	703.573	[M+H]+	C39H79N2O6P
SM(d14:1_20:1)	9.68	701.56	[M+H]+	C39H77N2O6P
SM(d14:1_22:0)	11.88	731.609	[M+H]+	C41H83N2O6P
SM(d14:1_22:1)	10.83	729.593	[M+H]+	C41H81N2O6P
SM(d14:1_24:0)	13.18	759.637	[M+H]+	C43H87N2O6P
SM(d14:1_26:0)	14.5	787.671	[M+H]+	C45H91N2O6P
SM(d14:1_26:1)	13.4	785.652	[M+H]+	C45H89N2O6P
SM(d14:1_28:1)	14.48	813.687	[M+H]+	C47H93N2O6P
SM(d14:1_28:2)	13.41	811.666	[M+H]+	C47H91N2O6P
SM(d14:1_30:2)	14.73	839.697	[M+H]+	C49H95N2O6P
TG(12:0_12:0_12:0)	16.46	661.538	[M+Na]+	C39H74O6
TG(12:0_14:0_16:0)	19.87	740.678	[M+NH4]+	C45H86O6
TG(12:0_16:0_18:2)	20.09	792.706	[M+NH4]+	C49H90O6
TG(14:0_16:0_16:1)	20.92	794.721	[M+NH4]+	C49H92O6
TG(14:0_16:0_18:1)	21.86	822.755	[M+NH4]+	C51H96O6
TG(14:0_16:0_18:2)	21.07	820.734	[M+NH4]+	C51H94O6
TG(14:0_16:1_22:6)	19.51	871.678	[M+Na]+	C55H92O6
TG(14:0_18:1_18:2)	21.14	851.709	[M+Na]+	C53H96O6
TG(14:0_18:2_18:2)	20.33	844.739	[M+NH4]+	C53H94O6
TG(14:0_18:2_22:6)	19.66	892.737	[M+NH4]+	C57H94O6
TG(16:0_16:0_16:0)	22.68	829.726	[M+Na]+	C51H98O6
TG(16:0_16:0_18:0)	23.51	852.806	[M+NH4]+	C53H102O6
TG(16:0_16:0_18:1)	22.73	850.779	[M+NH4]+	C53H100O6
TG(16:0_16:0_18:2)	21.97	853.728	[M+Na]+	C53H98O6
TG(16:0_16:0_20:6)	20.45	873.695	[M+Na]+	C55H94O6
TG(16:0_16:0_22:6)	21.4	896.773	[M+NH4]+	C57H98O6
TG(16:0_16:1_18:1)	21.97	848.77	[M+NH4]+	C53H98O6
TG(16:0_16:1_18:2)	21.14	846.757	[M+NH4]+	C53H96O6
TG(16:0_16:1_18:3)	20.58	844.739	[M+NH4]+	C53H94O6
TG(16:0_16:1_20:5)	20.13	873.695	[M+Na]+	C55H94O6
TG(16:0_16:1_22:6)	20.51	894.751	[M+NH4]+	C57H96O6
TG(16:0_18:0_18:1)	23.52	878.812	[M+NH4]+	C55H104O6
TG(16:0_18:0_20:0)	24.88	908.864	[M+NH4]+	C57H110O6
TG(16:0_18:0_22:6)	22.29	924.806	[M+NH4]+	C59H102O6
TG(16:0_18:1_18:1)	22.76	876.802	[M+NH4]+	C55H102O6
TG(16:0_18:1_18:2)	22.04	874.787	[M+NH4]+	C55H100O6
TG(16:0_18:1_18:3)	21.58	877.726	[M+Na]+	C55H98O6
TG(16:0_18:1_20:1)	23.55	909.787	[M+Na]+	C57H106O6
TG(16:0_18:1_20:4)	21.8	898.789	[M+NH4]+	C57H100O6
TG(16:0_18:1_22:5)	21.84	924.806	[M+NH4]+	C59H102O6
TG(16:0_18:1_22:6)	21.44	922.782	[M+NH4]+	C59H100O6
TG(16:0_18:2_18:2)	21.27	877.725	[M+Na]+	C55H98O6
TG(16:0_18:2_18:3)	20.5	870.751	[M+NH4]+	C55H96O6
TG(16:0_18:2_20:4)	21.09	896.773	[M+NH4]+	C57H98O6
TG(16:0_18:2_20:5)	20.32	894.752	[M+NH4]+	C57H96O6
TG(16:0_18:2_22:6)	20.66	920.765	[M+NH4]+	C59H98O6
TG(16:0_18:3_22:6)	19.91	923.712	[M+Na]+	C59H96O6
TG(16:0_20:1_20:1)	24.25	937.823	[M+Na]+	C59H110O6
TG(16:0_20:1_22:1)	24.86	965.85	[M+Na]+	C61H114O6
TG(16:0_20:5_20:5)	19.35	921.692	[M+Na]+	C59H94O6
TG(16:0_20:5_22:6)	19.68	942.76	[M+NH4]+	C61H96O6
TG(16:0_22:6_22:6)	20.03	973.725	[M+Na]+	C63H98O6
TG(16:1_16:1_18:3)	19.54	847.68	[M+Na]+	C53H92O6
TG(16:1_16:1_20:4)	19.65	873.694	[M+Na]+	C55H94O6
TG(16:1_18:1_18:2)	21.29	872.766	[M+NH4]+	C55H98O6
TG(16:1_18:2_18:3)	19.65	868.732	[M+NH4]+	C55H94O6
TG(16:1_18:2_22:6)	19.74	918.754	[M+NH4]+	C59H96O6
TG(16:1_22:6_22:6)	19.07	971.711	[M+Na]+	C63H96O6
TG(16:2_22:3_22:3)	21.79	981.785	[M+Na]+	C63H106O6
TG(18:0_18:0_18:0)	24.88	913.822	[M+Na]+	C57H110O6
TG(18:0_18:0_18:1)	24.26	911.807	[M+Na]+	C57H108O6
TG(18:0_18:0_20:6)	22.29	929.759	[M+Na]+	C59H102O6
TG(18:0_18:1_18:2)	22.82	902.814	[M+NH4]+	C57H104O6
TG(18:0_18:1_20:4)	22.68	926.822	[M+NH4]+	C59H104O6
TG(18:0_18:1_22:5)	22.63	952.833	[M+NH4]+	C61H106O6
TG(18:0_18:1_22:6)	22.31	950.814	[M+NH4]+	C61H104O6
TG(18:1_18:1_18:2)	22.08	900.798	[M+NH4]+	C57H102O6
TG(18:1_18:1_20:1)	23.56	930.85	[M+NH4]+	C59H108O6
TG(18:1_18:1_22:3)	23.2	959.802	[M+Na]+	C61H108O6
TG(18:1_18:2_18:2)	21.34	898.788	[M+NH4]+	C57H100O6
TG(18:1_18:2_18:3)	20.55	896.773	[M+NH4]+	C57H98O6
TG(18:1_18:2_20:1)	22.87	928.833	[M+NH4]+	C59H106O6
TG(18:1_18:2_20:5)	20.37	925.726	[M+Na]+	C59H98O6
TG(18:1_18:2_22:6)	20.72	951.744	[M+Na]+	C61H100O6
TG(18:1_20:1_22:6)	22.31	976.834	[M+NH4]+	C63H106O6
TG(18:1_20:3_22:6)	20.8	977.755	[M+Na]+	C63H102O6
TG(18:1_20:4_20:5)	20.19	949.729	[M+Na]+	C61H98O6
TG(18:1_20:5_22:6)	19.73	973.726	[M+Na]+	C63H98O6
TG(18:2_18:2_18:3)	19.81	899.708	[M+Na]+	C57H96O6
TG(18:2_18:2_20:5)	19.55	918.753	[M+NH4]+	C59H96O6
TG(18:2_18:2_22:5)	20.28	951.744	[M+Na]+	C61H100O6
TG(18:2_18:2_22:6)	19.9	944.767	[M+NH4]+	C61H98O6
TG(18:2_20:1_20:1)	23.63	961.821	[M+Na]+	C61H110O6
TG(18:2_20:4_20:5)	19.31	942.759	[M+NH4]+	C61H96O6
TG(18:2_20:4_22:6)	19.63	968.775	[M+NH4]+	C63H98O6
TG(18:2_20:5_22:6)	18.87	971.713	[M+Na]+	C63H96O6
TG(20:1_22:6_22:6)	20.7	1027.77	[M+Na]+	C67H104O6
TG(20:4_22:6_22:6)	18.96	1021.72	[M+Na]+	C67H98O6
TG(20:5_20:5_22:6)	17.82	993.694	[M+Na]+	C65H94O6
TG(20:5_22:6_22:6)	18.21	1019.71	[M+Na]+	C67H96O6
TG(22:5_22:6_22:6)	18.99	1047.74	[M+Na]+	C69H100O6
TG(22:6_22:6_22:6)	18.59	1045.73	[M+Na]+	C69H98O6

## Sheet: Table S4
Supplementary Table 4: Lipids identified in plasma (ESI-)
Lipid name	Rt(min)	Mz	Adduct ion	Formula
FA 16:0	4.95	255.233	[M-H]-	C16H32O2
FA 16:1	3.45	253.218	[M-H]-	C16H30O2
FA 16:2	2.47	251.201	[M-H]-	C16H28O2
FA 16:4	2.13	247.17	[M-H]-	C16H24O2
FA 18:0	7.25	283.264	[M-H]-	C18H36O2
FA 18:1	5.48	281.249	[M-H]-	C18H34O2
FA 18:2	4.02	279.233	[M-H]-	C18H32O2
FA 18:3	2.98	277.217	[M-H]-	C18H30O2
FA 18:4	2.29	275.202	[M-H]-	C18H28O2
FA 20:0	8.67	311.296	[M-H]-	C20H40O2
FA 20:1	7.53	309.28	[M-H]-	C20H38O2
FA 20:2	6.05	307.265	[M-H]-	C20H36O2
FA 20:3	4.68	305.249	[M-H]-	C20H34O2
FA 20:4	3.67	303.233	[M-H]-	C20H32O2
FA 20:5	2.74	301.218	[M-H]-	C20H30O2
FA 20:6	2.74	299.202	[M-H]-	C20H28O2
FA 22:0	9.96	339.327	[M-H]-	C22H44O2
FA 22:1	8.79	337.312	[M-H]-	C22H42O2
FA 22:2	7.87	335.296	[M-H]-	C22H40O2
FA 22:4	5.48	331.264	[M-H]-	C22H36O2
FA 22:5	4.22	329.248	[M-H]-	C22H34O2
FA 22:6	3.26	327.232	[M-H]-	C22H32O2
FAHFA(18:2_18:1)	4	559.474	[M-H]-	C36H64O4
FAHFA(18:1_20:3)	5.49	585.487	[M-H]-	C38H66O4
FAHFA(18:2_20:4)	4.02	581.457	[M-H]-	C38H62O4
LysoPC 16:0	2.72	540.331	[M+FA-H]-	C24H50NO7P
LysoPC 18:1	3.05	566.346	[M+FA-H]-	C26H52NO7P
LysoPC 18:2	2.23	564.331	[M+FA-H]-	C26H50NO7P
LysoPC 20:4	2.17	588.333	[M+FA-H]-	C28H50NO7P
LysoPC 22:6	2.1	612.329	[M+FA-H]-	C30H50NO7P
LysoPE 16:0	2.73	452.278	[M-H]-	C21H44NO7P
LysoPE 18:1	3.05	478.294	[M-H]-	C23H46NO7P
LysoPE 18:2	2.24	476.277	[M-H]-	C23H44NO7P
LysoPE 20:4	2.19	500.279	[M-H]-	C25H44NO7P
LysoPE 20:5	1.46	498.264	[M-H]-	C25H42NO7P
LysoPE 22:6	2.1	524.277	[M-H]-	C27H44NO7P
LysoPI 20:3	1.44	621.305	[M-H]-	C29H51O12P
LysoPI 20:4	1.36	619.293	[M-H]-	C29H49O12P
PC(16:0_18:2)	11.25	802.557	[M+FA-H]-	C42H80NO8P
PC(18:0_18:2)	12.47	830.592	[M+FA-H]-	C44H84NO8P
PE(16:0_20:4)	11.26	738.513	[M-H]-	C41H74NO8P
PE(18:0_20:4)	12.47	766.543	[M-H]-	C43H78NO8P
PE(18:1_20:4)	11.4	764.524	[M-H]-	C43H76NO8P
PI(16:0_18:2)	9.28	833.517	[M-H]-	C43H79O13P
PI(18:0_18:2)	10.19	861.547	[M-H]-	C45H83O13P
PI(16:0_20:3)	9.53	859.536	[M-H]-	C45H81O13P
PI(18:1_18:2)	9.4	859.536	[M-H]-	C45H81O13P
PI(16:0_20:4)	9.19	857.52	[M-H]-	C45H79O13P
PI(18:0_20:3)	10.46	887.569	[M-H]-	C47H85O13P
PI(18:0_20:4)	10.08	885.554	[M-H]-	C47H83O13P
PI(18:0_20:5)	9.5	883.533	[M-H]-	C47H81O13P
PI(18:1_20:4)	9.31	883.533	[M-H]-	C47H81O13P
PI(18:0_22:6)	9.86	909.55	[M-H]-	C49H83O13P
PE(P-16:0_18:1)	12.98	700.527	[M-H]-	C39H76NO7P
PE(P-18:0_18:1)	14.27	728.563	[M-H]-	C41H80NO7P
PE(P-16:0_20:4)	11.8	722.512	[M-H]-	C41H74NO7P
PE(P-18:0_20:4)	13.05	750.544	[M-H]-	C43H78NO7P
PE(P-16:0_22:6)	11.48	746.514	[M-H]-	C43H74NO7P
PE(P-20:0_20:4)	14.34	778.579	[M-H]-	C45H82NO7P
PE(P-18:0_22:6)	12.7	774.546	[M-H]-	C45H78NO7P
PE(P-20:0_22:6)	13.97	802.579	[M-H]-	C47H82NO7P
SM(d14:2_28:0)	14.45	857.675	[M+FA-H]-	C47H93N2O6P

## Sheet: Table S5
Supplementary Table 5: Altered lipids in the lung tissue (ESI+) of RSV pneumonia mics versus the normal control mice
Lipid name	p value (p < 0.05)	Fold change (threshold of 1.5 or 0.67)
TG(16:1_18:1_18:2)	0.022258	0.133908
TG(18:1_18:1_18:2)	0.025288	0.146795
TG(16:0_18:1_22:6)	0.002818	0.16354
TG(18:1_18:1_20:4)	0.0010617	0.179472
TG(18:0_18:1_18:1)	0.044942	0.203314
TG(18:1_18:2_18:2)	0.038768	0.208855
TG(16:0_16:0_22:5)	0.0015319	0.216361
TG(16:0_18:2_22:6)	0.0017836	0.218508
TG(16:0_16:0_18:1)	0.036074	0.231884
TG(18:0_18:4_20:2)	0.028327	0.344994
TG(16:0_16:0_18:2)	0.015602	0.356303
TG(16:0_16:0_16:0)	0.038668	0.373357
TG(18:2_18:2_18:2)	0.025288	0.373511
DG(18:1_18:1)	0.033938	0.438154
TG(18:0_18:0_20:6)	0.029076	0.454959
DG(18:1_18:2)	0.0042513	0.500927
PG(16:0_22:5)	0.0093724	0.556886
DG(16:0_22:5)	0.0013172	0.597229
DG(16:0_22:6)	0.012659	0.606943
PG(16:0_22:6)	0.018502	0.609273
PC(P-14:0_18:0)	0.014933	0.632671
SM(d14:1_20:0)	0.02418	1.51734
BMP(18:0_22:6)	0.0045824	1.52856
Cer[NS](d18:2_24:1)	0.029076	1.54055
SM(d14:0_20:0)	0.010637	1.61886
PC(P-20:0_18:5)	0.0027264	1.62983
PE(18:0_18:2)	0.013265	1.64707
Cer[NS](d18:2_24:2)	0.019674	1.67608
PC(P-14:0_26:4)	0.001238	1.68745
LysoPC 18:1	0.031824	1.7175
Cer[NS](d18:1_16:0)	0.014401	1.72592
Cer[NDS](d18:0_24:0)	0.014933	1.7421
Cer[NS](d18:2_16:0)	0.019674	1.80545
BMP(18:1_22:6)	0.00038158	1.81977
PC(P-18:0_22:3)	0.0033908	1.82618
PC(P-14:0_24:1)	0.014401	1.86411
Acylcarnitine 24:1	0.019572	1.86752
Acylcarnitine 14:1	0.02276	1.92311
PE(P-16:0_18:2)	0.013265	1.93147
Cer[NS](d18:1_22:1)	0.016148	1.95929
PC(P-14:0_26:1)	0.009199	1.98645
PC(P-22:0_18:5)	0.0070089	1.98894
Acylcarnitine 14:0	0.014933	2.02889
Acylcarnitine 16:0	0.0045543	2.39555
Cer[NDS](d18:0_24:1)	0.003178	2.58558
Acylcarnitine 16:1	0.019572	2.61015
PC(P-16:0_22:3)	0.001238	2.96016
Acylcarnitine 4:0	0.005144	2.97912
Cer[NDS](d18:0_16:0)	0.014401	2.98303
PC(P-14:0_24:0)	0.01036	2.99581
PC(P-14:0_20:0)	0.0050455	3.1212
PC(P-18:0_22:6)	0.00086795	3.25161
GlcCer[NS](d18:1_16:0)	0.003178	3.31664
PC(P-14:0_24:4)	0.00086795	3.35897
PC(P-14:0_22:3)	0.00055989	3.37166
Acylcarnitine 18:1	0.005144	3.77259
PC(P-14:0_22:1)	0.0015319	4.38385
PC(P-14:0_22:0)	0.0023684	4.52837
PC(P-14:0_24:2)	0.0015319	5.30054
PC(P-18:0_26:4)	0.00038158	5.4277
PC(P-14:0_26:2)	0.0017836	5.66701
PC(P-14:0_20:1)	0.0011125	6.07386
PC(P-16:0_26:2)	0.00086795	8.3612
GlcCer[NDS](d18:0_16:0)	0.0034714	20.0698

## Sheet: Table S6
Supplementary Table 6: Altered lipids in the lung tissue (ESI-) of RSV pneumonia mics versus the normal control mice
Lipid name	p value (p < 0.05)	Fold change (threshold of 1.5 or 0.67)
PG(16:0_22:5)	0.018149	0.603391
PE(P-16:0_20:5)	0.045729	0.652018
PE(18:0_18:2)	0.0045129	1.51417
Cer[NS](d18:2_24:1)	0.047183	1.61671
Cer[NS](d18:1_16:0)	0.015093	1.6573
PI(16:0_18:2)	0.00033766	1.73774
PG(18:0_20:4)	0.010424	1.75509
Cer[NS](d18:1_24:1)	0.015981	1.75741
FA 22:1	0.036923	1.77904
Cer[NS](d18:2_16:0)	0.017873	1.79456
PE(P-16:0_18:2)	0.0054516	1.90509
FA 18:2	0.036923	1.99908
PE(16:0_22:6)	0.044873	2.02556
FA 22:6	0.036923	2.08407
PG(18:1_18:2)	0.017873	2.17689
PE(P-18:0_18:2)	0.0044343	2.20327
PI(18:1_18:2)	0.00033766	2.2409
FA 20:2	0.015093	2.48645
PI(18:0_18:2)	0.00040841	2.53024
FA 22:2	0.0043937	2.56043
FA 22:4	0.017873	2.69884
FA 20:4	0.017873	2.92167
Cer[NDS](d18:0_16:0)	0.0052523	2.95377
PG(18:2_22:6)	0.0054516	3.11352
LysoPI 18:0	0.023091	3.70466
PG(18:1_20:4)	6.2514e-05	6.93241
PG(18:2_18:2)	0.00033766	8.23452
LysoPI 16:0	0.017873	10.5346
PG(18:2_20:4)	0.00033766	10.8093

## Sheet: Table S7
Supplementary Table 7: Altered lipids in plasma (ESI+) of RSV pneumonia mics versus the normal control mice
Lipid name	p value (p < 0.05)	Fold change (threshold of 1.5 or 0.67)
TG(16:0_16:1_20:5)	0.0011472	0.179549
TG(14:0_16:0_18:1)	0.0011472	0.186449
TG(14:0_16:0_16:1)	0.0080388	0.196808
TG(16:0_16:1_18:2)	0.0011472	0.217122
TG(16:0_16:1_22:6)	0.0011472	0.222227
TG(14:0_16:0_18:2)	0.00023578	0.234665
TG(12:0_16:0_18:2)	0.01025	0.235023
TG(14:0_16:1_22:6)	0.0011472	0.252666
TG(16:0_16:1_18:1)	0.0011472	0.280505
TG(16:1_16:1_18:3)	0.0020617	0.290537
TG(16:0_16:0_20:6)	0.0022293	0.303131
TG(14:0_18:1_18:2)	0.0011472	0.306063
TG(16:0_20:1_22:1)	0.028648	0.325457
TG(16:1_16:1_20:4)	0.01025	0.332358
TG(16:0_16:0_22:6)	0.01346	0.350865
TG(18:0_18:0_18:1)	8.667e-05	0.365831
TG(18:1_18:1_20:1)	0.031551	0.366959
TG(16:0_18:0_18:1)	0.0032718	0.376861
TG(16:0_16:0_18:1)	0.0031626	0.394089
TG(16:0_20:1_20:1)	0.016557	0.402512
TG(16:0_18:1_22:5)	0.0011472	0.404073
TG(16:0_16:0_18:2)	0.0011472	0.407199
TG(18:0_18:1_18:2)	0.011295	0.424358
TG(14:0_18:2_22:6)	0.01209	0.43611
TG(16:0_18:1_18:1)	0.0020617	0.4367
TG(16:0_16:0_18:0)	0.047797	0.442204
TG(16:0_18:2_18:3)	0.015208	0.451814
TG(16:0_18:2_20:4)	0.0077856	0.454153
TG(16:1_18:2_22:6)	0.0016412	0.454442
TG(14:0_18:2_18:2)	0.0084435	0.457226
Acylcarnitine 16:1	0.002408	0.475443
TG(16:0_18:0_20:0)	0.0011472	0.499201
TG(16:0_16:0_16:0)	0.0032718	0.510517
Acylcarnitine 12:0	0.0032718	0.513321
TG(16:1_22:6_22:6)	0.010782	0.520562
TG(16:0_18:1_22:6)	0.01209	0.528123
TG(16:0_18:1_18:2)	0.0071023	0.541389
Acylcarnitine 4:0	0.023731	0.550327
TG(18:0_18:0_18:0)	0.0011472	0.553159
TG(18:0_18:1_22:6)	0.010818	0.556824
LysoPC 20:5	0.0077856	0.564175
TG(16:0_18:1_20:1)	0.0011472	0.580653
TG(18:1_18:1_18:2)	0.0035698	0.597586
TG(18:0_18:1_22:5)	0.018953	0.613384
TG(18:1_18:2_20:1)	0.028442	0.6182
Acylcarnitine 16:0	0.006093	0.631393
DG(18:1_18:2)	0.0022293	0.643956
PC(P-20:0_22:6)	0.014028	1.90763
PC(P-16:0_22:3)	0.0233	2.48102

## Sheet: Table S8
Supplementary Table 8: Altered lipids in plasma (ESI-) of RSV pneumonia mics versus the normal control mice
Lipid name	p value (p < 0.05)	Fold change (threshold of 1.5 or 0.67)
LysoPI 20:3	0.0053642	0.0787836
FA 18:4	0.0053642	0.324254
LysoPI 20:4	0.008354	0.349577
LysoPE 20:5	0.016641	0.355619
FA 20:5	0.00014233	0.424592
PI(18:0_20:5)	0.0053642	0.437867
LysoPC 18:1	0.012476	0.459664
PI(16:0_20:3)	0.016641	0.464533
FA 22:5	0.0048282	0.469175
FA 16:0	0.0053642	0.523862
PI(18:0_20:3)	0.0053642	0.531858
LysoPC 20:4	0.032853	0.56899
FA 22:6	0.0053642	0.573658
LysoPC 22:6	0.0053642	0.621659
FA 20:3	0.0079595	0.644579
PI(16:0_20:4)	0.0053642	0.650237
PI(18:0_22:6)	0.0079595	0.659239
FA 16:4	0.0053642	1.5316
PE(18:0_20:4)	0.012476	1.91461

## Sheet: Table S9
Supplementary Table 9: Correlation coefficients of perturbed lipids of plasma and lung tissue
plasma lung	Acylcarnitine 12:0	Acylcarnitine 16:0	Acylcarnitine 16:1	Acylcarnitine 4:0	DG(18:1_18:2)	FA 16:0	FA 16:4	FA 18:4	FA 20:3	FA 20:5	FA 22:5	FA 22:6	LysoPC 18:1	LysoPC 20:4	LysoPC 20:5	LysoPC 22:6	LysoPE 20:5	LysoPI 20:3	LysoPI 20:4	PC(P-16:0_22:3)	PC(P-20:0_22:6)	PE(18:0_20:4)	PI(16:0_20:3)	PI(16:0_20:4)	PI(18:0_20:3)	PI(18:0_20:5)	PI(18:0_22:6)	TG(12:0_16:0_18:2)	TG(14:0_16:0_16:1)	TG(14:0_16:0_18:1)	TG(14:0_16:0_18:2)	TG(14:0_16:1_22:6)	TG(14:0_18:1_18:2)	TG(14:0_18:2_18:2)	TG(14:0_18:2_22:6)	TG(16:0_16:0_16:0)	TG(16:0_16:0_18:0)	TG(16:0_16:0_18:1)	TG(16:0_16:0_18:2)	TG(16:0_16:0_20:6)	TG(16:0_16:0_22:6)	TG(16:0_16:1_18:1)	TG(16:0_16:1_18:2)	TG(16:0_16:1_20:5)	TG(16:0_16:1_22:6)	TG(16:0_18:0_18:1)	TG(16:0_18:0_20:0)	TG(16:0_18:1_18:1)	TG(16:0_18:1_18:2)
Acylcarnitine 14:0	-0.469	-0.479	-0.621	-0.34	-0.585	-0.57	0.676	-0.708	-0.514	-0.816	-0.734	-0.731	-0.742	-0.273	-0.66	-0.498	-0.875	-0.896	-0.604	0.731	0.832	0.785	-0.856	-0.594	-0.899	-0.687	-0.801	-0.669	-0.705	-0.804	-0.793	-0.709	-0.739	-0.477	-0.43	-0.471	-0.315	-0.484	-0.553	-0.54	-0.403	-0.748	-0.769	-0.656	-0.79	-0.518	-0.54	-0.707	-0.48
Acylcarnitine 14:1	-0.491	-0.525	-0.508	-0.162	-0.47	-0.758	0.67	-0.739	-0.68	-0.845	-0.783	-0.653	-0.474	-0.48	-0.287	-0.451	-0.589	-0.827	-0.755	0.575	0.68	0.685	-0.521	-0.622	-0.55	-0.522	-0.486	-0.592	-0.593	-0.742	-0.769	-0.52	-0.759	-0.589	-0.366	-0.712	-0.543	-0.735	-0.766	-0.593	-0.657	-0.785	-0.738	-0.623	-0.748	-0.73	-0.566	-0.527	-0.547
Acylcarnitine 16:0	-0.496	-0.462	-0.568	-0.383	-0.577	-0.634	0.795	-0.699	-0.61	-0.893	-0.792	-0.737	-0.748	-0.361	-0.615	-0.585	-0.825	-0.914	-0.726	0.713	0.857	0.813	-0.807	-0.663	-0.86	-0.675	-0.748	-0.75	-0.796	-0.872	-0.855	-0.798	-0.819	-0.526	-0.481	-0.568	-0.467	-0.654	-0.684	-0.667	-0.589	-0.821	-0.845	-0.705	-0.853	-0.654	-0.503	-0.773	-0.598
Acylcarnitine 16:1	-0.354	-0.49	-0.456	-0.128	-0.492	-0.602	0.561	-0.612	-0.614	-0.754	-0.623	-0.644	-0.585	-0.266	-0.424	-0.497	-0.741	-0.838	-0.592	0.715	0.727	0.683	-0.657	-0.613	-0.712	-0.574	-0.631	-0.494	-0.576	-0.716	-0.703	-0.495	-0.692	-0.464	-0.185	-0.574	-0.485	-0.613	-0.679	-0.415	-0.446	-0.717	-0.668	-0.608	-0.702	-0.553	-0.508	-0.573	-0.409
Acylcarnitine 18:1	-0.47	-0.455	-0.56	-0.272	-0.609	-0.699	0.826	-0.74	-0.715	-0.897	-0.813	-0.752	-0.708	-0.483	-0.585	-0.587	-0.824	-0.913	-0.689	0.781	0.872	0.789	-0.791	-0.791	-0.775	-0.709	-0.68	-0.708	-0.767	-0.868	-0.86	-0.751	-0.838	-0.6	-0.453	-0.576	-0.398	-0.667	-0.724	-0.62	-0.561	-0.836	-0.843	-0.752	-0.857	-0.657	-0.575	-0.773	-0.608
Acylcarnitine 24:1	-0.372	-0.316	-0.442	-0.226	-0.292	-0.663	0.744	-0.71	-0.478	-0.752	-0.727	-0.619	-0.513	-0.484	-0.4	-0.533	-0.572	-0.648	-0.599	0.545	0.624	0.476	-0.537	-0.785	-0.423	-0.652	-0.367	-0.593	-0.631	-0.715	-0.675	-0.586	-0.696	-0.485	-0.526	-0.419	-0.366	-0.571	-0.595	-0.69	-0.595	-0.68	-0.718	-0.578	-0.754	-0.65	-0.489	-0.619	-0.56
Acylcarnitine 4:0	-0.606	-0.661	-0.711	-0.3	-0.417	-0.822	0.559	-0.846	-0.589	-0.882	-0.86	-0.77	-0.5	-0.41	-0.405	-0.605	-0.641	-0.843	-0.86	0.647	0.616	0.687	-0.617	-0.736	-0.619	-0.66	-0.621	-0.573	-0.564	-0.812	-0.825	-0.651	-0.843	-0.665	-0.516	-0.611	-0.341	-0.735	-0.778	-0.814	-0.7	-0.861	-0.842	-0.639	-0.815	-0.805	-0.672	-0.626	-0.672
BMP(18:0_22:6)	-0.444	-0.407	-0.518	-0.114	-0.239	-0.569	0.618	-0.606	-0.349	-0.762	-0.708	-0.705	-0.491	-0.476	-0.261	-0.569	-0.529	-0.761	-0.768	0.468	0.545	0.717	-0.52	-0.486	-0.561	-0.49	-0.489	-0.668	-0.583	-0.708	-0.722	-0.666	-0.751	-0.498	-0.507	-0.546	-0.358	-0.631	-0.623	-0.652	-0.675	-0.704	-0.771	-0.673	-0.737	-0.648	-0.44	-0.492	-0.554
BMP(18:1_22:6)	-0.441	-0.377	-0.495	-0.217	-0.229	-0.591	0.744	-0.606	-0.402	-0.73	-0.674	-0.671	-0.584	-0.484	-0.375	-0.606	-0.533	-0.712	-0.694	0.553	0.629	0.68	-0.501	-0.565	-0.502	-0.51	-0.403	-0.656	-0.662	-0.773	-0.748	-0.683	-0.795	-0.484	-0.533	-0.516	-0.321	-0.692	-0.697	-0.74	-0.714	-0.754	-0.809	-0.676	-0.829	-0.722	-0.474	-0.655	-0.6
Cer[NDS](d18:0_16:0)	-0.182	-0.165	-0.282	-0.106	-0.635	-0.586	0.64	-0.585	-0.548	-0.802	-0.65	-0.608	-0.511	-0.567	-0.48	-0.757	-0.68	-0.705	-0.622	0.727	0.79	0.645	-0.668	-0.802	-0.637	-0.699	-0.554	-0.566	-0.566	-0.77	-0.824	-0.819	-0.812	-0.803	-0.676	-0.403	-0.184	-0.645	-0.725	-0.446	-0.605	-0.835	-0.842	-0.745	-0.719	-0.635	-0.51	-0.774	-0.796
Cer[NDS](d18:0_24:0)	-0.464	-0.352	-0.479	-0.512	-0.594	-0.631	0.801	-0.622	-0.504	-0.783	-0.668	-0.535	-0.665	-0.48	-0.622	-0.613	-0.638	-0.768	-0.693	0.69	0.838	0.787	-0.669	-0.595	-0.722	-0.612	-0.535	-0.788	-0.812	-0.876	-0.893	-0.83	-0.846	-0.649	-0.59	-0.611	-0.408	-0.723	-0.739	-0.651	-0.669	-0.847	-0.868	-0.703	-0.785	-0.725	-0.578	-0.847	-0.726
Cer[NDS](d18:0_24:1)	-0.451	-0.374	-0.477	-0.296	-0.56	-0.737	0.754	-0.713	-0.662	-0.882	-0.818	-0.702	-0.557	-0.499	-0.464	-0.683	-0.617	-0.745	-0.749	0.687	0.781	0.685	-0.615	-0.765	-0.614	-0.68	-0.542	-0.712	-0.725	-0.869	-0.879	-0.815	-0.879	-0.72	-0.639	-0.568	-0.336	-0.78	-0.806	-0.766	-0.763	-0.885	-0.899	-0.722	-0.813	-0.805	-0.542	-0.817	-0.818
Cer[NS](d18:1_16:0)	-0.482	-0.439	-0.572	-0.327	-0.417	-0.707	0.7	-0.745	-0.499	-0.865	-0.8	-0.717	-0.556	-0.471	-0.515	-0.699	-0.666	-0.768	-0.778	0.664	0.677	0.648	-0.664	-0.793	-0.629	-0.735	-0.589	-0.676	-0.669	-0.823	-0.827	-0.802	-0.828	-0.651	-0.658	-0.492	-0.31	-0.679	-0.707	-0.785	-0.694	-0.829	-0.863	-0.668	-0.814	-0.75	-0.581	-0.733	-0.73
Cer[NS](d18:1_22:1)	-0.453	-0.367	-0.392	-0.551	-0.228	-0.662	0.57	-0.541	-0.435	-0.572	-0.54	-0.239	-0.306	-0.405	-0.415	-0.445	-0.271	-0.494	-0.687	0.437	0.479	0.428	-0.269	-0.591	-0.226	-0.392	-0.171	-0.536	-0.577	-0.674	-0.687	-0.551	-0.653	-0.517	-0.495	-0.578	-0.463	-0.737	-0.692	-0.71	-0.712	-0.696	-0.658	-0.465	-0.64	-0.78	-0.504	-0.595	-0.61
Cer[NS](d18:2_16:0)	-0.385	-0.337	-0.436	-0.281	-0.387	-0.693	0.699	-0.753	-0.546	-0.816	-0.788	-0.694	-0.567	-0.362	-0.376	-0.557	-0.607	-0.683	-0.679	0.534	0.667	0.491	-0.568	-0.78	-0.508	-0.632	-0.461	-0.59	-0.629	-0.763	-0.726	-0.635	-0.746	-0.531	-0.603	-0.431	-0.412	-0.636	-0.67	-0.76	-0.676	-0.756	-0.776	-0.562	-0.801	-0.73	-0.468	-0.675	-0.648
Cer[NS](d18:2_24:1)	-0.453	-0.362	-0.461	-0.264	-0.42	-0.687	0.691	-0.719	-0.556	-0.812	-0.8	-0.71	-0.497	-0.381	-0.307	-0.539	-0.524	-0.629	-0.682	0.504	0.607	0.497	-0.518	-0.701	-0.492	-0.62	-0.447	-0.641	-0.629	-0.724	-0.712	-0.649	-0.729	-0.567	-0.604	-0.472	-0.364	-0.636	-0.657	-0.782	-0.69	-0.725	-0.753	-0.523	-0.712	-0.725	-0.476	-0.644	-0.686
Cer[NS](d18:2_24:2)	-0.501	-0.42	-0.518	-0.304	-0.426	-0.72	0.724	-0.768	-0.551	-0.823	-0.813	-0.701	-0.528	-0.445	-0.352	-0.536	-0.54	-0.668	-0.682	0.514	0.651	0.563	-0.532	-0.666	-0.516	-0.624	-0.449	-0.628	-0.64	-0.758	-0.735	-0.638	-0.764	-0.572	-0.575	-0.502	-0.348	-0.656	-0.681	-0.813	-0.702	-0.756	-0.782	-0.559	-0.758	-0.746	-0.513	-0.673	-0.684
DG(16:0_22:5)	0.558	0.465	0.645	0.474	0.645	0.669	-0.581	0.726	0.533	0.642	0.68	0.405	0.37	0.465	0.587	0.228	0.576	0.638	0.477	-0.622	-0.58	-0.521	0.671	0.695	0.555	0.699	0.488	0.669	0.619	0.592	0.654	0.508	0.527	0.579	0.346	0.508	0.234	0.306	0.352	0.402	0.186	0.53	0.526	0.459	0.416	0.378	0.717	0.496	0.416
DG(16:0_22:6)	0.797	0.698	0.728	0.533	0.661	0.686	-0.5	0.636	0.597	0.604	0.63	0.41	0.244	0.297	0.422	0.129	0.362	0.528	0.546	-0.569	-0.432	-0.522	0.425	0.365	0.489	0.506	0.44	0.642	0.536	0.508	0.638	0.412	0.497	0.623	0.318	0.725	0.239	0.453	0.499	0.506	0.319	0.558	0.461	0.225	0.305	0.54	0.819	0.426	0.466
DG(18:1_18:1)	0.573	0.577	0.489	0.234	0.501	0.755	-0.529	0.691	0.531	0.841	0.731	0.58	0.229	0.445	0.166	0.531	0.387	0.611	0.783	-0.467	-0.465	-0.54	0.38	0.489	0.507	0.612	0.452	0.575	0.483	0.603	0.686	0.528	0.668	0.717	0.456	0.728	0.516	0.73	0.739	0.666	0.733	0.717	0.658	0.376	0.482	0.765	0.617	0.453	0.698
DG(18:1_18:2)	0.659	0.7	0.682	0.415	0.486	0.753	-0.417	0.801	0.562	0.76	0.77	0.524	0.241	0.246	0.37	0.271	0.527	0.628	0.634	-0.471	-0.391	-0.385	0.551	0.643	0.54	0.711	0.581	0.488	0.458	0.508	0.538	0.369	0.463	0.484	0.237	0.553	0.464	0.408	0.427	0.609	0.346	0.515	0.46	0.238	0.388	0.503	0.624	0.336	0.398
FA 18:2	-0.307	-0.343	-0.502	-0.249	-0.351	-0.456	0.522	-0.576	-0.523	-0.572	-0.599	-0.498	-0.547	-0.237	-0.63	-0.304	-0.739	-0.687	-0.334	0.598	0.631	0.489	-0.731	-0.722	-0.587	-0.608	-0.601	-0.421	-0.559	-0.597	-0.509	-0.467	-0.479	-0.194	-0.112	-0.202	-0.191	-0.238	-0.269	-0.396	-0.109	-0.453	-0.497	-0.567	-0.612	-0.235	-0.303	-0.523	-0.197
FA 20:2	-0.409	-0.461	-0.51	0.152	-0.263	-0.562	0.214	-0.531	-0.546	-0.534	-0.631	-0.626	-0.096	-0.364	0.007	-0.296	-0.304	-0.486	-0.541	0.398	0.182	0.348	-0.311	-0.598	-0.212	-0.386	-0.348	-0.291	-0.18	-0.365	-0.43	-0.309	-0.466	-0.51	-0.244	-0.359	0.024	-0.373	-0.427	-0.42	-0.318	-0.44	-0.428	-0.407	-0.354	-0.403	-0.465	-0.175	-0.383
FA 20:4	-0.463	-0.429	-0.58	-0.223	-0.605	-0.687	0.672	-0.78	-0.724	-0.845	-0.879	-0.799	-0.628	-0.358	-0.439	-0.435	-0.753	-0.825	-0.615	0.638	0.748	0.65	-0.777	-0.794	-0.713	-0.685	-0.676	-0.665	-0.691	-0.77	-0.735	-0.637	-0.727	-0.506	-0.372	-0.45	-0.32	-0.497	-0.546	-0.622	-0.431	-0.689	-0.734	-0.671	-0.722	-0.522	-0.469	-0.642	-0.526
FA 22:1	-0.369	-0.359	-0.483	-0.392	-0.442	-0.639	0.638	-0.73	-0.56	-0.733	-0.725	-0.493	-0.534	-0.327	-0.612	-0.399	-0.705	-0.716	-0.507	0.586	0.727	0.507	-0.697	-0.777	-0.593	-0.698	-0.556	-0.559	-0.668	-0.723	-0.657	-0.555	-0.609	-0.374	-0.32	-0.38	-0.424	-0.443	-0.454	-0.566	-0.378	-0.62	-0.641	-0.584	-0.694	-0.482	-0.405	-0.63	-0.419
FA 22:2	-0.442	-0.421	-0.564	-0.271	-0.435	-0.652	0.815	-0.712	-0.626	-0.811	-0.773	-0.698	-0.683	-0.463	-0.613	-0.566	-0.773	-0.831	-0.573	0.738	0.819	0.715	-0.756	-0.788	-0.686	-0.73	-0.604	-0.679	-0.79	-0.842	-0.765	-0.691	-0.776	-0.432	-0.326	-0.469	-0.351	-0.586	-0.608	-0.667	-0.496	-0.731	-0.786	-0.758	-0.835	-0.571	-0.466	-0.759	-0.507
FA 22:4	-0.453	-0.414	-0.541	-0.357	-0.58	-0.686	0.784	-0.761	-0.681	-0.832	-0.809	-0.668	-0.681	-0.412	-0.573	-0.464	-0.77	-0.833	-0.587	0.673	0.832	0.681	-0.777	-0.778	-0.724	-0.706	-0.622	-0.689	-0.78	-0.819	-0.762	-0.65	-0.741	-0.468	-0.34	-0.499	-0.444	-0.553	-0.583	-0.626	-0.465	-0.716	-0.75	-0.682	-0.773	-0.557	-0.481	-0.725	-0.513
FA 22:6	-0.339	-0.396	-0.462	-0.162	-0.633	-0.668	0.509	-0.716	-0.709	-0.845	-0.809	-0.738	-0.551	-0.321	-0.407	-0.57	-0.735	-0.802	-0.643	0.642	0.747	0.644	-0.743	-0.778	-0.737	-0.677	-0.718	-0.515	-0.571	-0.765	-0.738	-0.656	-0.752	-0.586	-0.36	-0.417	-0.313	-0.581	-0.634	-0.57	-0.501	-0.747	-0.76	-0.691	-0.701	-0.558	-0.4	-0.668	-0.616
GlcCer[NDS](d18:0_16:0)	-0.537	-0.491	-0.575	-0.26	-0.597	-0.771	0.688	-0.701	-0.788	-0.864	-0.836	-0.718	-0.496	-0.512	-0.469	-0.636	-0.607	-0.777	-0.77	0.754	0.742	0.729	-0.606	-0.783	-0.593	-0.638	-0.582	-0.667	-0.672	-0.851	-0.891	-0.793	-0.882	-0.763	-0.555	-0.615	-0.223	-0.793	-0.832	-0.74	-0.706	-0.894	-0.876	-0.744	-0.788	-0.793	-0.606	-0.781	-0.794
GlcCer[NS](d18:1_16:0)	-0.506	-0.493	-0.575	-0.276	-0.451	-0.719	0.673	-0.688	-0.54	-0.889	-0.787	-0.721	-0.532	-0.534	-0.456	-0.761	-0.64	-0.838	-0.869	0.695	0.682	0.784	-0.653	-0.732	-0.684	-0.688	-0.619	-0.712	-0.682	-0.854	-0.881	-0.841	-0.892	-0.714	-0.575	-0.62	-0.37	-0.793	-0.801	-0.753	-0.761	-0.876	-0.905	-0.757	-0.8	-0.783	-0.587	-0.721	-0.766
LysoPC 18:1	-0.433	-0.418	-0.522	-0.203	-0.413	-0.716	0.472	-0.742	-0.584	-0.825	-0.851	-0.781	-0.434	-0.282	-0.278	-0.599	-0.552	-0.672	-0.768	0.533	0.545	0.499	-0.565	-0.784	-0.525	-0.633	-0.573	-0.563	-0.528	-0.737	-0.732	-0.682	-0.761	-0.618	-0.601	-0.414	-0.259	-0.636	-0.664	-0.796	-0.676	-0.758	-0.787	-0.59	-0.71	-0.72	-0.456	-0.613	-0.72
LysoPI 16:0	-0.483	-0.459	-0.641	-0.499	-0.354	-0.599	0.569	-0.66	-0.462	-0.668	-0.689	-0.691	-0.717	-0.174	-0.543	-0.504	-0.696	-0.777	-0.689	0.651	0.579	0.585	-0.753	-0.825	-0.658	-0.596	-0.597	-0.656	-0.701	-0.775	-0.716	-0.674	-0.719	-0.401	-0.417	-0.386	-0.334	-0.503	-0.535	-0.708	-0.427	-0.662	-0.724	-0.592	-0.749	-0.555	-0.549	-0.666	-0.474
LysoPI 18:0	-0.444	-0.309	-0.531	-0.522	-0.512	-0.575	0.691	-0.624	-0.415	-0.67	-0.641	-0.492	-0.578	-0.371	-0.589	-0.395	-0.651	-0.715	-0.635	0.63	0.607	0.553	-0.731	-0.788	-0.617	-0.645	-0.5	-0.816	-0.751	-0.692	-0.736	-0.696	-0.621	-0.529	-0.55	-0.485	-0.421	-0.41	-0.435	-0.473	-0.345	-0.602	-0.647	-0.532	-0.582	-0.476	-0.643	-0.583	-0.477
PC(P-14:0_18:0)	0.389	0.37	0.522	0.292	0.384	0.422	-0.356	0.47	0.45	0.55	0.549	0.4	0.29	0.136	0.653	0.308	0.596	0.55	0.429	-0.608	-0.503	-0.432	0.576	0.549	0.513	0.555	0.631	0.459	0.443	0.523	0.581	0.584	0.44	0.393	0.415	0.277	0.025	0.274	0.304	0.371	0.192	0.519	0.493	0.437	0.489	0.346	0.411	0.475	0.354
PC(P-14:0_20:0)	-0.476	-0.423	-0.511	-0.231	-0.577	-0.718	0.708	-0.671	-0.673	-0.885	-0.807	-0.743	-0.522	-0.498	-0.437	-0.716	-0.621	-0.759	-0.762	0.73	0.734	0.721	-0.636	-0.755	-0.656	-0.704	-0.599	-0.721	-0.706	-0.841	-0.868	-0.83	-0.871	-0.742	-0.576	-0.589	-0.299	-0.771	-0.799	-0.729	-0.726	-0.862	-0.879	-0.727	-0.749	-0.763	-0.56	-0.78	-0.808
PC(P-14:0_20:1)	-0.087	-0.145	0.086	-0.24	-0.053	-0.261	-0.281	-0.087	-0.048	-0.135	-0.094	0.087	0.193	0.152	0.36	-0.097	0.283	-0.015	-0.491	-0.236	-0.133	-0.016	0.258	0.095	0.068	0.206	0.079	0.005	0.091	-0.09	-0.155	-0.002	-0.163	-0.266	-0.164	-0.359	-0.499	-0.46	-0.39	-0.253	-0.525	0.24	-0.146	0.086	0.004	-0.453	-0.041	0.055	-0.334
PC(P-14:0_22:0)	-0.474	-0.425	-0.514	-0.239	-0.565	-0.742	0.685	-0.681	-0.705	-0.884	-0.823	-0.728	-0.505	-0.484	-0.45	-0.712	-0.61	-0.764	-0.781	0.739	0.752	0.725	-0.616	-0.766	-0.628	-0.681	-0.592	-0.715	-0.708	-0.87	-0.897	-0.838	-0.895	-0.751	-0.59	-0.6	-0.29	-0.807	-0.829	-0.751	-0.756	-0.896	-0.905	-0.764	-0.784	-0.8	-0.55	-0.8	-0.827
PC(P-14:0_22:1)	-0.48	-0.435	-0.512	-0.217	-0.534	-0.738	0.68	-0.676	-0.693	-0.882	-0.821	-0.737	-0.49	-0.478	-0.417	-0.709	-0.591	-0.752	-0.785	0.716	0.724	0.709	-0.589	-0.748	-0.608	-0.667	-0.578	-0.699	-0.687	-0.852	-0.879	-0.818	-0.884	-0.738	-0.588	-0.601	-0.295	-0.81	-0.83	-0.762	-0.769	-0.886	-0.893	-0.74	-0.779	-0.807	-0.543	-0.775	-0.818
PC(P-14:0_22:3)	-0.528	-0.433	-0.585	-0.318	-0.495	-0.678	0.839	-0.689	-0.591	-0.856	-0.797	-0.737	-0.652	-0.512	-0.54	-0.633	-0.683	-0.82	-0.723	0.726	0.784	0.785	-0.695	-0.704	-0.694	-0.685	-0.586	-0.814	-0.816	-0.873	-0.869	-0.82	-0.86	-0.604	-0.543	-0.594	-0.346	-0.703	-0.719	-0.739	-0.661	-0.823	-0.874	-0.753	-0.825	-0.712	-0.568	-0.785	-0.682
PC(P-14:0_24:0)	-0.37	-0.331	-0.314	-0.324	-0.475	-0.584	0.505	-0.508	-0.618	-0.755	-0.685	-0.631	-0.514	-0.185	-0.221	-0.581	-0.458	-0.647	-0.795	0.437	0.587	0.57	-0.457	-0.559	-0.565	-0.375	-0.516	-0.545	-0.562	-0.729	-0.729	-0.701	-0.756	-0.558	-0.525	-0.512	-0.473	-0.787	-0.782	-0.731	-0.79	-0.774	-0.765	-0.531	-0.698	-0.77	-0.303	-0.659	-0.737
PC(P-14:0_24:1)	-0.402	-0.38	-0.466	-0.318	-0.412	-0.565	0.46	-0.472	-0.615	-0.65	-0.61	-0.498	-0.356	-0.224	-0.582	-0.594	-0.528	-0.566	-0.593	0.728	0.583	0.508	-0.521	-0.715	-0.487	-0.594	-0.562	-0.53	-0.573	-0.708	-0.732	-0.744	-0.677	-0.565	-0.473	-0.405	-0.116	-0.625	-0.634	-0.623	-0.523	-0.724	-0.7	-0.589	-0.626	-0.626	-0.441	-0.72	-0.647
PC(P-14:0_24:2)	-0.407	-0.434	-0.476	-0.156	-0.471	-0.688	0.569	-0.618	-0.659	-0.853	-0.762	-0.752	-0.49	-0.36	-0.427	-0.787	-0.615	-0.738	-0.763	0.755	0.712	0.691	-0.585	-0.734	-0.629	-0.663	-0.632	-0.6	-0.627	-0.852	-0.857	-0.815	-0.885	-0.698	-0.542	-0.533	-0.247	-0.825	-0.852	-0.751	-0.769	-0.898	-0.896	-0.749	-0.797	-0.802	-0.48	-0.797	-0.809
PC(P-14:0_24:4)	-0.542	-0.452	-0.602	-0.303	-0.478	-0.699	0.818	-0.702	-0.584	-0.857	-0.801	-0.726	-0.598	-0.529	-0.542	-0.647	-0.659	-0.796	-0.722	0.738	0.762	0.764	-0.669	-0.71	-0.661	-0.711	-0.572	-0.803	-0.795	-0.865	-0.87	-0.816	-0.858	-0.632	-0.558	-0.599	-0.31	-0.71	-0.725	-0.752	-0.671	-0.83	-0.874	-0.747	-0.809	-0.728	-0.594	-0.778	-0.701
PC(P-14:0_26:1)	-0.413	-0.37	-0.435	-0.091	-0.457	-0.616	0.631	-0.604	-0.57	-0.844	-0.766	-0.775	-0.462	-0.477	-0.281	-0.713	-0.546	-0.676	-0.732	0.564	0.608	0.641	-0.541	-0.642	-0.587	-0.616	-0.563	-0.585	-0.553	-0.723	-0.742	-0.77	-0.793	-0.666	-0.587	-0.464	-0.218	-0.704	-0.73	-0.728	-0.737	-0.777	-0.812	-0.635	-0.706	-0.712	-0.421	-0.664	-0.774
PC(P-14:0_26:2)	-0.43	-0.402	-0.481	-0.075	-0.335	-0.607	0.545	-0.563	-0.56	-0.788	-0.752	-0.757	-0.445	-0.395	-0.289	-0.681	-0.494	-0.696	-0.769	0.572	0.613	0.708	-0.464	-0.534	-0.529	-0.477	-0.546	-0.584	-0.55	-0.781	-0.798	-0.773	-0.846	-0.616	-0.582	-0.506	-0.157	-0.777	-0.782	-0.767	-0.798	-0.836	-0.865	-0.737	-0.799	-0.778	-0.38	-0.672	-0.754
PC(P-14:0_26:4)	-0.48	-0.386	-0.458	-0.258	-0.453	-0.646	0.654	-0.6	-0.538	-0.797	-0.736	-0.691	-0.487	-0.452	-0.302	-0.658	-0.459	-0.652	-0.769	0.542	0.623	0.67	-0.469	-0.55	-0.542	-0.518	-0.469	-0.656	-0.616	-0.773	-0.802	-0.773	-0.835	-0.683	-0.643	-0.56	-0.269	-0.782	-0.793	-0.789	-0.816	-0.826	-0.848	-0.627	-0.736	-0.809	-0.484	-0.715	-0.813
PC(P-16:0_22:3)	-0.545	-0.438	-0.592	-0.359	-0.561	-0.696	0.857	-0.698	-0.639	-0.862	-0.805	-0.714	-0.65	-0.518	-0.58	-0.613	-0.695	-0.82	-0.707	0.756	0.812	0.785	-0.716	-0.728	-0.709	-0.709	-0.597	-0.833	-0.841	-0.88	-0.883	-0.828	-0.856	-0.629	-0.535	-0.611	-0.348	-0.699	-0.718	-0.723	-0.635	-0.827	-0.868	-0.748	-0.805	-0.704	-0.595	-0.809	-0.692
PC(P-16:0_26:2)	-0.494	-0.482	-0.534	-0.266	-0.459	-0.736	0.64	-0.668	-0.654	-0.869	-0.793	-0.702	-0.485	-0.476	-0.457	-0.749	-0.585	-0.764	-0.834	0.699	0.699	0.72	-0.562	-0.732	-0.589	-0.628	-0.584	-0.614	-0.63	-0.859	-0.882	-0.829	-0.901	-0.731	-0.609	-0.583	-0.27	-0.852	-0.868	-0.811	-0.817	-0.922	-0.914	-0.737	-0.838	-0.855	-0.538	-0.784	-0.829
PC(P-18:0_22:3)	-0.539	-0.4	-0.558	-0.368	-0.492	-0.613	0.871	-0.623	-0.585	-0.782	-0.737	-0.692	-0.669	-0.482	-0.525	-0.54	-0.638	-0.755	-0.656	0.671	0.73	0.723	-0.66	-0.667	-0.646	-0.613	-0.523	-0.799	-0.806	-0.801	-0.797	-0.772	-0.782	-0.538	-0.516	-0.554	-0.329	-0.632	-0.652	-0.705	-0.587	-0.739	-0.79	-0.652	-0.764	-0.649	-0.551	-0.748	-0.618
PC(P-18:0_22:6)	-0.519	-0.425	-0.569	-0.317	-0.49	-0.694	0.811	-0.691	-0.586	-0.854	-0.79	-0.713	-0.594	-0.512	-0.535	-0.651	-0.655	-0.779	-0.73	0.729	0.752	0.73	-0.66	-0.735	-0.647	-0.704	-0.562	-0.791	-0.781	-0.855	-0.868	-0.822	-0.849	-0.649	-0.598	-0.585	-0.322	-0.711	-0.732	-0.744	-0.679	-0.832	-0.868	-0.719	-0.803	-0.739	-0.596	-0.78	-0.719
PC(P-18:0_26:4)	-0.506	-0.414	-0.557	-0.313	-0.467	-0.697	0.808	-0.682	-0.57	-0.837	-0.771	-0.678	-0.57	-0.546	-0.541	-0.665	-0.629	-0.759	-0.716	0.73	0.749	0.726	-0.637	-0.735	-0.614	-0.705	-0.527	-0.776	-0.775	-0.854	-0.864	-0.815	-0.852	-0.654	-0.586	-0.584	-0.307	-0.722	-0.737	-0.74	-0.687	-0.832	-0.869	-0.734	-0.799	-0.742	-0.595	-0.786	-0.725
PC(P-20:0_18:5)	-0.495	-0.373	-0.532	-0.362	-0.461	-0.627	0.811	-0.636	-0.53	-0.802	-0.749	-0.708	-0.677	-0.481	-0.475	-0.613	-0.623	-0.784	-0.745	0.634	0.73	0.755	-0.65	-0.663	-0.655	-0.579	-0.525	-0.792	-0.782	-0.845	-0.841	-0.816	-0.847	-0.583	-0.591	-0.557	-0.354	-0.7	-0.712	-0.743	-0.687	-0.801	-0.862	-0.714	-0.819	-0.716	-0.528	-0.761	-0.688
PC(P-22:0_18:5)	-0.481	-0.415	-0.56	-0.399	-0.48	-0.632	0.755	-0.633	-0.567	-0.783	-0.706	-0.633	-0.626	-0.497	-0.659	-0.681	-0.68	-0.759	-0.692	0.746	0.757	0.724	-0.675	-0.749	-0.643	-0.653	-0.585	-0.639	-0.694	-0.844	-0.85	-0.851	-0.841	-0.643	-0.618	-0.467	-0.17	-0.689	-0.73	-0.728	-0.635	-0.848	-0.865	-0.712	-0.849	-0.718	-0.573	-0.843	-0.723
PE(16:0_22:6)	-0.393	-0.212	-0.378	-0.608	-0.301	-0.324	0.694	-0.321	-0.328	-0.311	-0.297	-0.032	-0.439	-0.372	-0.717	-0.098	-0.392	-0.427	-0.245	0.458	0.552	0.443	-0.403	-0.366	-0.308	-0.297	-0.188	-0.529	-0.618	-0.495	-0.505	-0.447	-0.375	-0.215	-0.279	-0.363	-0.209	-0.285	-0.274	-0.309	-0.171	-0.4	-0.391	-0.365	-0.488	-0.314	-0.418	-0.528	-0.209
PE(18:0_18:2)	-0.519	-0.487	-0.526	-0.071	-0.338	-0.548	0.564	-0.482	-0.522	-0.768	-0.695	-0.675	-0.326	-0.543	-0.293	-0.659	-0.458	-0.67	-0.74	0.527	0.475	0.718	-0.471	-0.488	-0.551	-0.534	-0.568	-0.563	-0.5	-0.636	-0.68	-0.746	-0.719	-0.589	-0.416	-0.521	-0.156	-0.675	-0.654	-0.68	-0.667	-0.686	-0.725	-0.632	-0.606	-0.622	-0.387	-0.63	-0.658
PE(P-16:0_18:2)	-0.457	-0.442	-0.469	-0.161	-0.498	-0.696	0.608	-0.614	-0.654	-0.852	-0.768	-0.722	-0.431	-0.495	-0.328	-0.751	-0.526	-0.699	-0.778	0.649	0.637	0.684	-0.53	-0.692	-0.582	-0.633	-0.558	-0.596	-0.591	-0.783	-0.806	-0.785	-0.851	-0.732	-0.526	-0.561	-0.259	-0.812	-0.827	-0.756	-0.782	-0.842	-0.85	-0.688	-0.713	-0.781	-0.487	-0.724	-0.825
PE(P-16:0_20:5)	0.478	0.342	0.517	0.417	0.54	0.553	-0.761	0.564	0.669	0.535	0.59	0.426	0.527	0.322	0.612	0.172	0.569	0.55	0.269	-0.69	-0.662	-0.452	0.609	0.701	0.461	0.602	0.371	0.685	0.768	0.612	0.582	0.454	0.49	0.331	0.173	0.435	0.249	0.32	0.356	0.424	0.143	0.461	0.47	0.459	0.486	0.338	0.545	0.617	0.297
PE(P-18:0_18:2)	-0.453	-0.431	-0.483	-0.156	-0.552	-0.621	0.593	-0.53	-0.675	-0.833	-0.73	-0.679	-0.408	-0.478	-0.463	-0.749	-0.584	-0.712	-0.726	0.733	0.675	0.739	-0.592	-0.659	-0.656	-0.66	-0.662	-0.623	-0.611	-0.774	-0.822	-0.861	-0.819	-0.726	-0.503	-0.538	-0.163	-0.754	-0.766	-0.66	-0.682	-0.825	-0.831	-0.727	-0.675	-0.694	-0.46	-0.746	-0.794
PG(16:0_22:5)	0.405	0.321	0.541	0.326	0.448	0.417	-0.578	0.451	0.494	0.572	0.554	0.477	0.446	0.275	0.774	0.452	0.664	0.561	0.352	-0.767	-0.617	-0.518	0.694	0.68	0.593	0.707	0.627	0.602	0.64	0.62	0.629	0.719	0.529	0.412	0.383	0.253	-0.042	0.3	0.332	0.445	0.185	0.533	0.57	0.552	0.528	0.324	0.448	0.675	0.428
PG(16:0_22:6)	0.449	0.391	0.555	0.334	0.433	0.411	-0.529	0.417	0.481	0.597	0.543	0.472	0.392	0.261	0.766	0.515	0.633	0.555	0.412	-0.751	-0.582	-0.55	0.652	0.595	0.619	0.692	0.676	0.556	0.589	0.61	0.635	0.754	0.542	0.444	0.394	0.286	-0.05	0.368	0.387	0.495	0.264	0.569	0.586	0.522	0.522	0.38	0.432	0.674	0.483
PG(18:0_20:4)	-0.573	-0.468	-0.59	-0.429	-0.589	-0.684	0.863	-0.731	-0.686	-0.739	-0.758	-0.605	-0.716	-0.464	-0.492	-0.278	-0.636	-0.816	-0.558	0.599	0.828	0.766	-0.653	-0.553	-0.647	-0.497	-0.46	-0.747	-0.817	-0.805	-0.766	-0.541	-0.743	-0.435	-0.273	-0.647	-0.457	-0.587	-0.615	-0.611	-0.474	-0.7	-0.717	-0.652	-0.764	-0.587	-0.556	-0.684	-0.449
PG(18:1_18:2)	-0.142	-0.126	-0.244	-0.048	-0.27	-0.567	0.653	-0.59	-0.466	-0.595	-0.581	-0.438	-0.469	-0.625	-0.276	-0.428	-0.485	-0.637	-0.477	0.444	0.645	0.514	-0.453	-0.71	-0.301	-0.433	-0.192	-0.451	-0.525	-0.653	-0.603	-0.442	-0.655	-0.429	-0.328	-0.376	-0.344	-0.529	-0.55	-0.411	-0.492	-0.604	-0.649	-0.715	-0.715	-0.504	-0.342	-0.514	-0.43
PG(18:1_20:4)	-0.604	-0.517	-0.682	-0.391	-0.44	-0.75	0.88	-0.803	-0.582	-0.839	-0.828	-0.692	-0.684	-0.549	-0.569	-0.482	-0.694	-0.886	-0.728	0.69	0.809	0.807	-0.68	-0.674	-0.642	-0.624	-0.519	-0.809	-0.824	-0.891	-0.88	-0.701	-0.854	-0.545	-0.503	-0.665	-0.412	-0.682	-0.704	-0.742	-0.628	-0.829	-0.86	-0.754	-0.9	-0.732	-0.654	-0.726	-0.569
PG(18:2_18:2)	-0.492	-0.358	-0.583	-0.363	-0.498	-0.549	0.943	-0.626	-0.614	-0.68	-0.681	-0.629	-0.783	-0.499	-0.677	-0.374	-0.738	-0.788	-0.45	0.727	0.844	0.749	-0.735	-0.66	-0.644	-0.572	-0.498	-0.745	-0.835	-0.796	-0.752	-0.666	-0.723	-0.391	-0.367	-0.463	-0.216	-0.476	-0.526	-0.56	-0.361	-0.669	-0.722	-0.707	-0.817	-0.488	-0.536	-0.765	-0.418
PG(18:2_20:4)	-0.602	-0.503	-0.673	-0.4	-0.481	-0.717	0.9	-0.766	-0.631	-0.826	-0.822	-0.713	-0.732	-0.526	-0.586	-0.478	-0.709	-0.882	-0.691	0.702	0.833	0.825	-0.707	-0.67	-0.675	-0.608	-0.545	-0.804	-0.846	-0.895	-0.867	-0.72	-0.854	-0.517	-0.46	-0.631	-0.373	-0.67	-0.694	-0.746	-0.599	-0.813	-0.854	-0.763	-0.898	-0.698	-0.609	-0.766	-0.566
PG(18:2_22:6)	-0.348	-0.227	-0.479	-0.24	-0.189	-0.341	0.873	-0.533	-0.259	-0.57	-0.548	-0.525	-0.686	-0.404	-0.607	-0.26	-0.718	-0.684	-0.302	0.506	0.649	0.559	-0.696	-0.527	-0.577	-0.584	-0.441	-0.697**	-0.748**	-0.584*	-0.503*	-0.503*	-0.458	-0.075	-0.259	-0.282	-0.335	-0.179	-0.185	-0.399	-0.164	-0.382	-0.5	-0.535	-0.659	-0.225	-0.335	-0.477	-0.112
PI(16:0_18:2)	-0.568	-0.497	-0.639	-0.225	-0.405	-0.536	0.853	-0.622	-0.513	-0.747	-0.707	-0.725	-0.695	-0.502	-0.492	-0.41	-0.701	-0.841	-0.57	0.614	0.708	0.816	-0.691	-0.487	-0.712**	-0.554*	-0.577*	-0.725**	-0.74	-0.721	-0.695	-0.619	-0.697	-0.364	-0.283	-0.551	-0.317	-0.498	-0.523	-0.581	-0.428	-0.629	-0.692	-0.651	-0.748	-0.486	-0.502	-0.583	-0.377
PI(18:0_18:2)	-0.572	-0.562	-0.671	-0.322	-0.465	-0.695	0.706	-0.672	-0.619	-0.852	-0.772	-0.657	-0.513	-0.516	-0.68	-0.686	-0.715	-0.834	-0.741	0.816	0.738	0.792	-0.704	-0.739	-0.697	-0.748	-0.693	-0.684	-0.709	-0.846	-0.869	-0.838	-0.832	-0.644	-0.482	-0.58	-0.225	-0.704	-0.718	-0.712	-0.605	-0.844	-0.851	-0.759	-0.8	-0.695	-0.603	-0.765	-0.668
PI(18:1_18:2)	-0.425	-0.394	-0.494	-0.153	-0.443	-0.635	0.823	-0.612	-0.644	-0.797	-0.714	-0.67	-0.592	-0.6	-0.523	-0.649	-0.664	-0.785	-0.607	0.748	0.789	0.766	-0.634	-0.711	-0.608	-0.653	-0.52	-0.656	-0.729	-0.821	-0.796	-0.733	-0.823	-0.561	-0.381	-0.54	-0.268	-0.701	-0.725	-0.633	-0.606	-0.785	-0.818	-0.792	-0.812	-0.646	-0.49	-0.762	-0.614
SM(d14:0_20:0)	-0.456	-0.368	-0.446	-0.305	-0.452	-0.655	0.754	-0.613	-0.599	-0.749	-0.706	-0.663	-0.597	-0.432	-0.35	-0.579	-0.51	-0.67	-0.658	0.598	0.682	0.64	-0.523	-0.648	-0.534	-0.542	-0.405	-0.684	-0.725	-0.792	-0.76	-0.675	-0.802	-0.557	-0.458	-0.559	-0.381	-0.735	-0.749	-0.744	-0.699	-0.759	-0.79	-0.632	-0.74	-0.73	-0.49	-0.741	-0.68
SM(d14:1_20:0)	-0.393	-0.32	-0.415	-0.216	-0.44	-0.579	0.756	-0.565	-0.526	-0.734	-0.662	-0.685	-0.626	-0.483	-0.33	-0.608	-0.55	-0.696	-0.629	0.587	0.67	0.678	-0.573	-0.63	-0.586	-0.549	-0.432	-0.674	-0.701	-0.755	-0.723	-0.684	-0.78	-0.532	-0.422	-0.509	-0.354	-0.669	-0.689	-0.652	-0.635	-0.709	-0.769	-0.659	-0.714	-0.636	-0.455	-0.697	-0.631
TG(16:0_16:0_16:0)	0.373	0.284	0.379	0.391	0.554	0.686	-0.725	0.596	0.617	0.685	0.632	0.474	0.535	0.516	0.437	0.554	0.493	0.645	0.604	-0.668	-0.718	-0.608	0.55	0.772	0.492	0.586	0.326	0.704	0.757	0.795	0.784	0.659	0.781	0.637	0.406	0.584	0.423	0.711	0.723	0.587	0.599	0.741	0.757	0.676	0.65	0.667	0.563	0.761	0.675
TG(16:0_16:0_18:1)	0.466	0.417	0.424	0.28	0.508	0.763	-0.68	0.659	0.628	0.802	0.715	0.544	0.365	0.528	0.348	0.626	0.442	0.618	0.702	-0.637	-0.646	-0.578	0.443	0.692	0.46	0.65	0.375	0.653	0.655	0.759	0.79	0.656	0.786	0.727	0.495	0.665	0.426	0.802	0.809	0.696	0.751	0.802	0.775	0.592	0.636	0.799	0.595	0.696	0.77
TG(16:0_16:0_18:2)	0.288	0.305	0.38	0.207	0.498	0.443	-0.539	0.459	0.402	0.772	0.585	0.614	0.502	0.344	0.567	0.796	0.702	0.681	0.602	-0.686	-0.664	-0.664	0.72	0.618	0.8	0.751	0.748	0.563	0.585	0.701	0.706	0.853	0.698	0.574	0.475	0.34	0.217	0.556	0.575	0.529	0.523	0.698	0.746	0.627	0.608	0.506	0.353	0.721	0.67
TG(16:0_16:0_22:5)	0.606	0.57	0.628	0.397	0.523	0.859	-0.657	0.85	0.644	0.914	0.89	0.668	0.428	0.47	0.425	0.575	0.578	0.759	0.828	-0.619	-0.65	-0.615	0.593	0.778	0.581	0.736	0.554	0.692	0.667	0.808	0.833	0.688	0.806	0.71	0.559	0.657	0.456	0.739	0.75	0.82	0.723	0.831	0.817	0.593	0.72	0.809	0.653	0.663	0.741
TG(16:0_18:1_22:6)	0.602	0.571	0.62	0.371	0.488	0.837	-0.663	0.825	0.644	0.912	0.882	0.693	0.443	0.451	0.416	0.598	0.577	0.755	0.828	-0.617	-0.645	-0.62	0.578	0.758	0.579	0.716	0.56	0.674	0.661	0.809	0.825	0.698	0.813	0.686	0.557	0.641	0.438	0.756	0.765	0.846	0.747	0.836	0.825	0.594	0.744	0.822	0.621	0.674	0.743
TG(16:0_18:2_22:6)	0.571	0.568	0.592	0.341	0.434	0.829	-0.576	0.81	0.577	0.904	0.858	0.669	0.377	0.44	0.36	0.634	0.534	0.733	0.874	-0.566	-0.581	-0.59	0.528	0.733	0.545	0.691	0.547	0.616	0.58	0.778	0.809	0.689	0.804	0.711	0.596	0.628	0.44	0.773	0.778	0.842	0.79	0.842	0.822	0.571	0.727	0.846	0.606	0.623	0.766
TG(16:1_18:1_18:2)	0.537	0.515	0.51	0.29	0.463	0.783	-0.648	0.718	0.565	0.866	0.769	0.615	0.363	0.512	0.334	0.657	0.48	0.678	0.802	-0.597	-0.598	-0.61	0.473	0.659	0.524	0.678	0.465	0.647	0.613	0.754	0.796	0.677	0.794	0.731	0.545	0.68	0.455	0.802	0.807	0.764	0.794	0.821	0.796	0.56	0.664	0.831	0.618	0.642	0.774
TG(18:0_18:0_20:6)	0.464	0.486	0.483	0.312	0.394	0.754	-0.477	0.702	0.556	0.719	0.69	0.536	0.284	0.334	0.321	0.551	0.427	0.518	0.626	-0.573	-0.459	-0.354	0.437	0.784	0.384	0.701	0.387	0.476	0.505	0.632	0.625	0.5	0.637	0.605	0.395	0.49	0.356	0.628	0.651	0.715	0.586	0.66	0.628	0.406	0.522	0.686	0.583	0.573	0.641
TG(18:0_18:1_18:1)	0.505	0.534	0.44	0.213	0.308	0.682	-0.551	0.565	0.505	0.76	0.63	0.51	0.242	0.452	0.268	0.641	0.368	0.57	0.726	-0.527	-0.465	-0.536	0.328	0.523	0.421	0.584	0.396	0.5	0.502	0.634	0.663	0.57	0.684	0.606	0.375	0.646	0.442	0.79	0.77	0.715	0.763	0.719	0.675	0.459	0.567	0.772	0.505	0.54	0.671
TG(18:0_18:4_20:2)	0.347	0.359	0.415	0.276	0.51	0.648	-0.266	0.726	0.402	0.726	0.707	0.572	0.251	0.14	0.222	0.416	0.493	0.518	0.666	-0.399	-0.379	-0.248	0.514	0.706	0.481	0.642	0.527	0.44	0.328	0.505	0.578	0.49	0.514	0.646	0.642	0.351	0.333	0.399	0.466	0.525	0.46	0.591	0.555	0.259	0.419	0.563	0.546	0.385	0.605
TG(18:1_18:1_18:2)	0.54	0.54	0.491	0.214	0.415	0.728	-0.566	0.644	0.533	0.846	0.731	0.593	0.262	0.503	0.274	0.664	0.421	0.635	0.803	-0.536	-0.515	-0.603	0.403	0.55	0.503	0.631	0.483	0.571	0.518	0.68	0.739	0.659	0.744	0.713	0.504	0.666	0.404	0.794	0.785	0.741	0.799	0.781	0.749	0.515	0.599	0.803	0.549	0.564	0.759
TG(18:1_18:1_20:4)	0.568	0.562	0.587	0.365	0.574	0.836	-0.597	0.84	0.654	0.905	0.865	0.648	0.38	0.399	0.391	0.52	0.6	0.73	0.78	-0.603	-0.599	-0.524	0.613	0.808	0.596	0.773	0.584	0.645	0.612	0.722	0.758	0.613	0.709	0.689	0.496	0.625	0.508	0.648	0.673	0.716	0.614	0.751	0.718	0.485	0.608	0.719	0.651	0.576	0.671
TG(18:1_18:2_18:2)	0.487	0.492	0.466	0.182	0.456	0.703	-0.564	0.682	0.497	0.882	0.758	0.661	0.33	0.458	0.276	0.68	0.493	0.659	0.784	-0.521	-0.569	-0.606	0.466	0.539	0.58	0.661	0.548	0.562	0.507	0.694	0.743	0.678	0.754	0.71	0.572	0.6	0.387	0.749	0.761	0.731	0.791	0.796	0.776	0.518	0.636	0.786	0.516	0.588	0.773
TG(18:2_18:2_18:2)	0.549	0.549	0.491	0.328	0.435	0.861	-0.555	0.837	0.479	0.786	0.736	0.5	0.273	0.471	0.169	0.437	0.329	0.579	0.736	-0.422	-0.534	-0.478	0.292	0.494	0.355	0.547	0.255	0.525	0.482	0.67	0.719	0.397	0.718	0.713	0.525	0.737	0.53	0.764	0.794	0.728	0.793	0.783	0.703	0.394	0.607	0.877	0.704	0.506	0.697
[truncated: 19 more columns]
